# Supplementary material for: Coupling a large-scale glacier and hydrological model (OGGM v1.5.3 and CWatM V1.08) – towards an improved representation of mountain water resources in global assessments
Source: Copernicus journal article supplement (doi:10.5194/gmd-17-5123-2024), 2024-07-04
Supplement: Supplementary file 1 [file gmd-17-5123-2024-supplement.pdf]

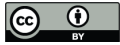

*Supplement of*

**Coupling a large-scale glacier and hydrological model (OGGM v1.5.3 and CWatM V1.08) – towards an improved representation of mountain water resources in global assessments**

**Sarah Hanus et al.**

*Correspondence to:* Sarah Hanus ([sarah.hanus@geo.uzh.ch](mailto:sarah.hanus@geo.uzh.ch))

The copyright of individual parts of the supplement might differ from the article licence.

# Supplementary Materials

## List of Figures

- S1 Schematization of the area reduction approach for a glacier that covers multiple grid cells used in this study. The same relative area reduction is applied to all grid cells that the glacier covers. In each grid cell, the glacier covered area is omitted in CWatM as shown on the right hand side. The black dot on the left hand side indicates the terminus of the glacier and therefore the grid cell to which glacier-sourced melt of the entire glacier is routed. . . . . I
- S2 Comparison of the parameter values of CWatM<sub>base</sub> and CWatM<sub>glacier</sub> for the upstream station of the Rhone river basin. Each boxplot comprises five parameter values. The dashed lines depict the parameter range. The parameters are explained in Burek et al. (2020) (Table 2). The crop factor, the preferential flow factor, the lake evaporation factor and the soil depth factors are lower for CWatM<sub>base</sub> than for CWatM<sub>glacier</sub>, whereas the recession factor is higher. This reduces evapotranspiration in CWatM<sub>base</sub> to compensate for missing glacier runoff. . . . . II
- S3 Spatial comparison of mean total evapotranspiration and groundwater contributions to stream-flow (baseflow) in the Rhone river basin. The variables over the five parameter sets for each CWatM<sub>base</sub> and CWatM<sub>glacier</sub> are compared. The difference in parameter sets upstream leads to lower evapotranspiration and higher baseflow in CWatM<sub>base</sub>. Only in upstream grid cells with glacier cover, the evapotranspiration in CWatM<sub>base</sub> is higher because OGGM assumes no evapotranspiration on glaciers. . . . . III
- S4 Mean hydrographs of the evaluation period (1990–1999) for the upstream station of the study basins. As insert the NPE and its error components over the whole evaluation period are given for CWatM<sub>base</sub> (index b) and CWatM<sub>glacier</sub> (index g) ( $\alpha_{NP}$ : variability,  $\beta_{NP}$ : mean,  $r_s$ : dynamics; Pool et al., 2018). Values closer to 1 indicate a better match. . . . . III
- S5 Hydrographs of the year with minimum and maximum annual discharge sum during the 30-year period 1990–2019 for the downstream stations of the study basins. Years 2000 or later fall within the calibration period. For the Rhone, the year with the second smallest discharge was chosen as the minimum year, because for the year with the lowest discharge, no observational data was available. . . . . IV
- S6 Hydrographs of the year with minimum and maximum annual discharge sum for the upstream stations of the study basins. For the Rhone, the year with the second smallest discharge was chosen as the minimum year, because for the year with the lowest discharge, no observational data was available. . . . . V
- S7 Simulated against observed annual minimum and maximum discharge of the 30 years in the past (1990–2019). The different colours refer to CWatM<sub>base</sub> and CWatM<sub>glacier</sub>. . . . . V
- S8 Comparison of flow duration curves of discharge data from 1990 until the last year of available observations (Fraser: 2016, Gloma and Rhine: 2018, Rhone: 2014). Over the whole period (first row) and split by seasons (Winter:Dec-Feb, Spring:Mar-May, Summer:Jun-Aug, Autumn:Sep-Nov) VI
- S9 Histograms of performance of six global parameter sets: Correlation coefficient, KGE and the non-parametric version of the KGE ( $KGE_{NP}$ ) of monthly discharge. The mean and median values are annotated as well as the percentage of gauges with KGE and  $KGE_{NP}$  below -1. . . . . VII
- S10 Simulated compared to observed mean annual discharge at gauges used for calibration for the time period 1990–2019. The ensemble mean of simulations with six parameter sets is used. . . . VII
- S11 Relative difference in mean annual and mean monthly discharge of CWatM<sub>glacier</sub> compared to CWatM<sub>base</sub> at the upstream gauges for 30 years from 2070–2099, shown per SSP scenario which translate into warming levels of +1.9°C and +4.2°C compared to pre-industrial time. . . . . VIII
- S12 Relative change in mean annual and mean monthly discharge at the downstream stations for the period 2070–2099 compared to 1990–2019 for CWatM<sub>base</sub> and CWatM<sub>glacier</sub>, shown per SSP scenario which translate into warming levels of +1.9°C and +4.2°C compared to pre-industrial time. The height of the bar indicates median change of GCMs and the grey lines indicate the maximum and minimum change of GCMs. . . . . IX
- S13 Absolute change in mean annual and mean monthly discharge at the upstream stations for the period 2070–2099 compared to 1990–2019 for CWatM<sub>base</sub> and CWatM<sub>glacier</sub>, shown per SSP scenario which translate into warming levels of +1.9°C and +4.2°C compared to pre-industrial time. The height of the bar indicates median change of GCMs and the grey lines indicate the maximum and minimum change of GCMs. . . . . IX

|     |                                                                                                                                                                                                                                                                                                                                                                                                                                                                                                                                      |       |
|-----|--------------------------------------------------------------------------------------------------------------------------------------------------------------------------------------------------------------------------------------------------------------------------------------------------------------------------------------------------------------------------------------------------------------------------------------------------------------------------------------------------------------------------------------|-------|
| S14 | Glacier volumes for the selected rivers simulated with OGGM, shown as water equivalent per total river basin area [mm], per SSP scenario which translate into mean warming levels of +1.9°C and +4.2°C compared to pre-industrial time. Shaded area shows the total range of the five GCMs.                                                                                                                                                                                                                                          | X     |
| S15 | Absolute mean glacier contribution to annual and monthly discharge at the downstream gauge for the period 1990–2019 and for the period 2070–2099 for two SSP scenarios which translate into warming levels of +1.9°C and +4.2°C compared to pre-industrial time. The height of the bar indicates median change of GCMs and the grey lines indicate the maximum and minimum change of GCMs. Glacier contribution is estimated by subtracting $CW_{atM_{glacier,bare}}$ from $CW_{atM_{glacier}}$ .                                    | X     |
| S16 | Relative mean glacier contribution to annual and monthly discharge at the upstream gauge for the period 1990–2019 and for the period 2070–2099 for two SSP scenarios which translate into warming levels of +1.9°C and +4.2°C compared to pre-industrial time. The height of the bar indicates median change of GCMs and the grey lines indicate the maximum and minimum change of GCMs. Glacier contribution is estimated by subtracting $CW_{atM_{glacier,bare}}$ from $CW_{atM_{glacier}}$ .                                      | XI    |
| S17 | Simulated glacier-sourced melt volumes in the 56 glacierized river basins in the period 1990–2100. For future projections, the thick lines show multi-GCM means and thin lines denote individual GCMs results for SSP1-2.6 (blue) and SSP5-8.5 (red). Black line shows the past period (1990–2019)                                                                                                                                                                                                                                   | XII   |
| S18 | Relative mean glacier-sourced contribution to annual discharge for the period 1990–2019. Glacier-sourced melt comprises all melt on glaciers. Glacier contribution is estimated by subtracting $CW_{atM_{glacier,bare}}$ from $CW_{atM_{glacier}}$ .                                                                                                                                                                                                                                                                                 | XIII  |
| S19 | Relative difference in mean annual discharge between $CW_{atM_{glacier}}$ and $CW_{atM_{base}}$ at the outlet of 56 glacierized river basin with positive difference indicating larger discharge of $CW_{atM_{glacier}}$ plotted against percentage of glacier area in basin. The Santa Cruz river basin is not shown here because of very high relative differences due to low discharge.                                                                                                                                           | XIV   |
| S20 | The performance difference between $CW_{atM_{glacier}}$ and $CW_{atM_{base}}$ compared to the glacier coverage. The data is the same as for Fig. 7. Results are shown for individual calibrations (grey dots) and mean of all calibrations (blue dots) for the 10 year period 2004 to 2013.                                                                                                                                                                                                                                          | XIV   |
| S21 | Relative difference in average discharge in March (1990–2019) between $CW_{atM_{glacier}}$ and $CW_{atM_{base}}$ . Positive values indicate larger discharge of $CW_{atM_{glacier}}$ . The major glaciated river basins are shown in black.                                                                                                                                                                                                                                                                                          | XV    |
| S22 | Comparison of relative future change for annual discharge at end of the 21 <sup>st</sup> century for $CW_{atM_{base}}$ and $CW_{atM_{glacier}}$ for 56 glacierized river basins for SSP1-2.6. (a) Colored dots show the median of all GCMs and grey dots show individual GCMs. (b) Boxplots showing the relative future change of all basins for $CW_{atM_{base}}$ and $CW_{atM_{glacier}}$ and their difference.                                                                                                                    | XVI   |
| S23 | Comparison of relative future discharge change for the month with largest glacier-sourced melt contribution in the past at end of the 21 <sup>st</sup> century for $CW_{atM_{base}}$ and $CW_{atM_{glacier}}$ for 56 glacierized river basins for SSP5-8.5. (a) Colored dots show the median of all GCMs and grey dots show individual GCMs. (b) Boxplots showing the relative future change of all basins for $CW_{atM_{base}}$ and $CW_{atM_{glacier}}$ and their difference.                                                      | XVI   |
| S24 | Boxplots of difference in precipitation and snowfall input across the 56 glacierized river basins between $CW_{atM_{glacier}}$ with different precipitation factors ( $p_f$ ) and $CW_{atM_{base}}$ (base) for annual averages for the period 1990–2019. Each boxplot is based on 56 data points.                                                                                                                                                                                                                                    | XVII  |
| S25 | Performance comparison using same discharge stations as presented in Wiersma et al. (2022) between $CW_{atM_{base}}$ and $CW_{atM_{base}}$ with increased precipitation input ( $P_{base} + S_{add}$ ) for individual calibrations (grey dots) and mean of all calibrations (coloured dots) for the 10 year period 2004 to 2013. The performance metric used is NPE (Pool et al., 2018). The Santa Cruz River basin lies outside the figure boundaries. Dots with grey outlines show basins smaller than 10,000 km <sup>2</sup> .    | XVIII |
| S26 | Performance comparison using same discharge stations as presented in Wiersma et al. (2022) between $CW_{atM_{base}}$ with increased precipitation input ( $P_{base} + S_{add}$ ) and $CW_{atM_{glacier}}$ for individual calibrations (grey dots) and mean of all calibrations (coloured dots) for the 10 year period 2004 to 2013. The performance metric used is NPE (Pool et al., 2018). The Santa Cruz River basin lies outside the figure boundaries. Dots with grey outlines show basins smaller than 10,000 km <sup>2</sup> . | XVIII |
| S27 | Comparison of mean monthly discharge between 1990–2019 of observations and simulations by $CW_{atM_{base}}$ and $CW_{atM_{glacier}}$ using the global parameter set used in ISIMIP3 simulations and a globally fixed precipitation factor of 2 and 3 to show the effect on hydrological simulations.                                                                                                                                                                                                                                 | XIX   |

# List of Tables

S1    Area of basins, glacier coverage and contributing glacier melt derived from shapefiles of upstream basin area at most downstream discharge stations at 30 arcmin, 5 arcmin and 100 m resolution for 46 basins for which data was available from Burek and Smilovic (2022). Station No. refers to the GRDC station ID. Glacier melt is derived as summed annual mean glacier runoff (1990–2019) from OGGM simulations using all glaciers with terminus inside the shapefile corresponding to the respective resolution. The last three columns show the agreement of the 30 arcmin/5 arcmin resolution with the 100 m resolution. . . . . XXI

## S1 Model Coupling Approach

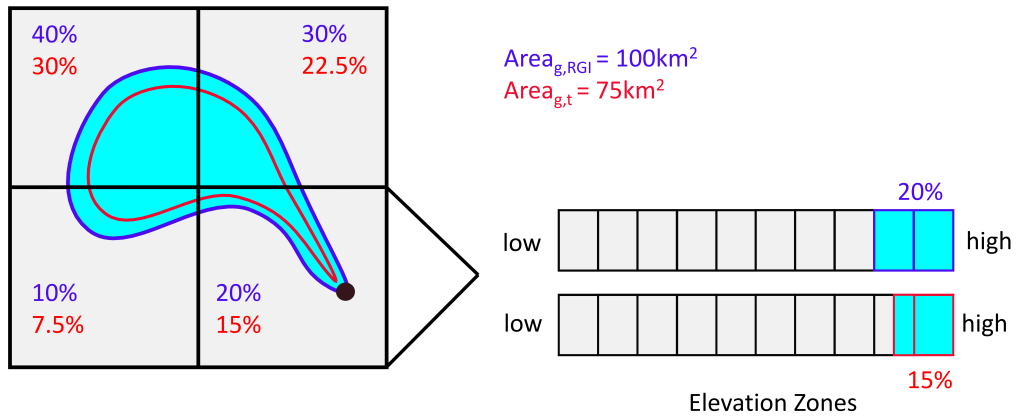

Figure S1: Schematization of the area reduction approach for a glacier that covers multiple grid cells used in this study. The same relative area reduction is applied to all grid cells that the glacier covers. In each grid cell, the glacier covered area is omitted in CWatM as shown on the right hand side. The black dot on the left hand side indicates the terminus of the glacier and therefore the grid cell to which glacier-sourced melt of the entire glacier is routed.

## S2 Model Evaluation

### S2.1 Snow cover penalty

The penalty for the snow cover error is a simple function that ensures that the automatic calibration is not steered to parameter sets that represent the discharge well at the cost of snow cover representation. Therefore, we assumed the mean snow cover in the selected river basins should be close to zero for at least two months per year. To build a penalty sensitive to snow accumulation, we set a threshold of 0.2m above which the objective function is negative (Eq. S1). We combine the snow cover error penalty with the non-parametric KGE to obtain a single objective function for calibration (Eq. S2).

$$O_{SC} = 1 - (S_{mean,2months}/0.2) \quad (S1)$$

$$O_{tot} = 0.8 \cdot O_{KGE} + 0.2 \cdot O_{SC} \quad (S2)$$

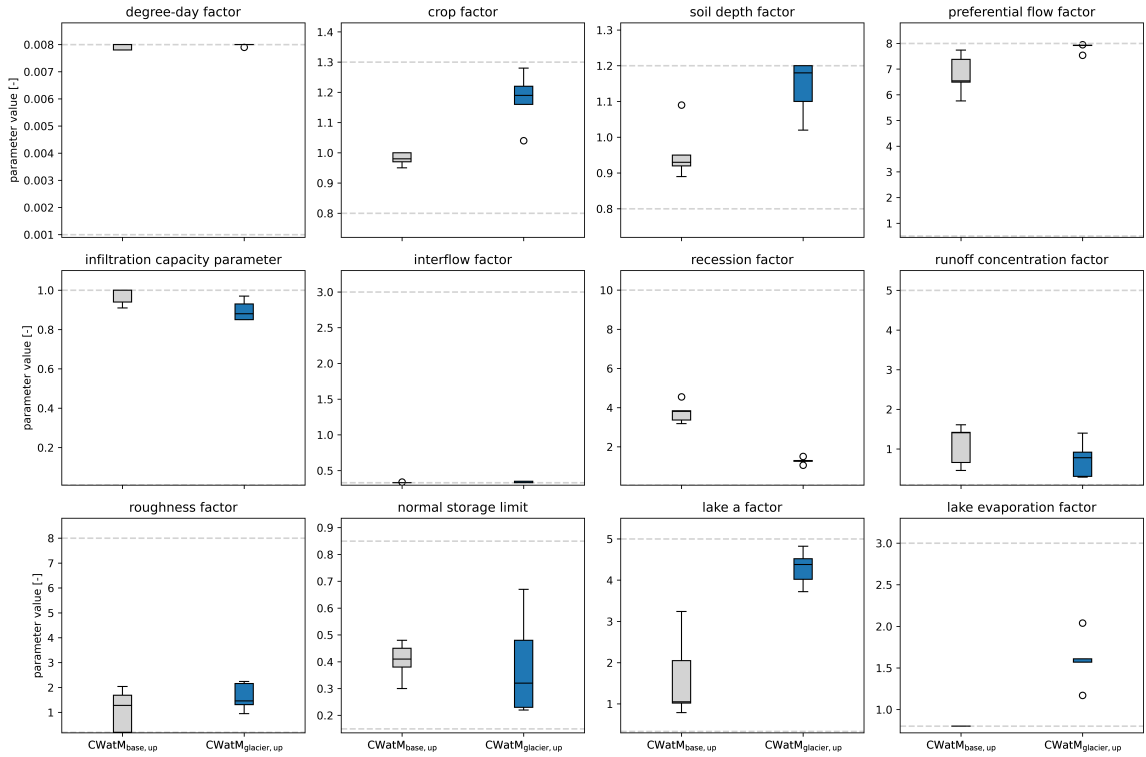

Figure S2: Comparison of the parameter values of  $CW_{atM}_{base}$  and  $CW_{atM}_{glacier}$  for the upstream station of the Rhone river basin. Each boxplot comprises five parameter values. The dashed lines depict the parameter range. The parameters are explained in Burek et al. (2020) (Table 2). The crop factor, the preferential flow factor, the lake evaporation factor and the soil depth factors are lower for  $CW_{atM}_{base}$  than for  $CW_{atM}_{glacier}$ , whereas the recession factor is higher. This reduces evapotranspiration in  $CW_{atM}_{base}$  to compensate for missing glacier runoff.

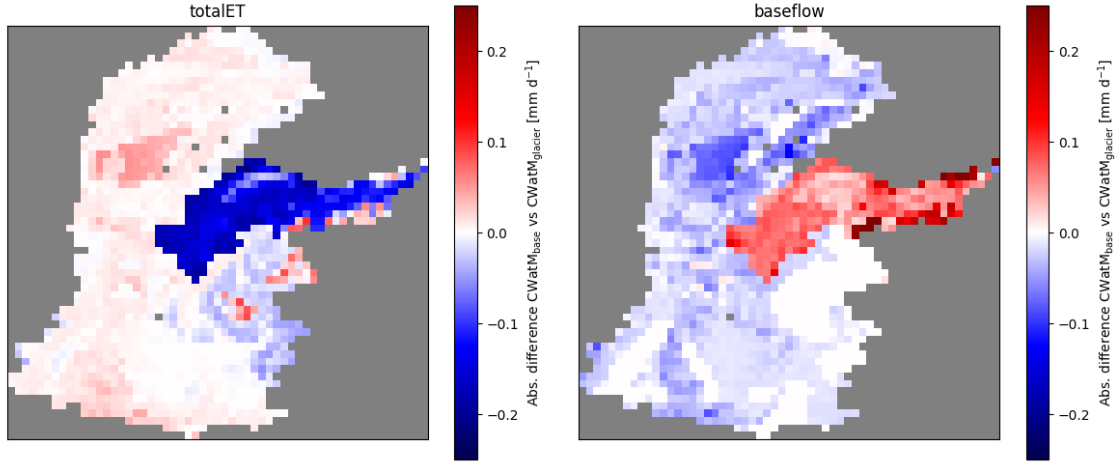

Figure S3: Spatial comparison of mean total evapotranspiration and groundwater contributions to streamflow (baseflow) in the Rhone river basin. The variables over the five parameter sets for each  $\text{CWatM}_{\text{base}}$  and  $\text{CWatM}_{\text{glacier}}$  are compared. The difference in parameter sets upstream leads to lower evapotranspiration and higher baseflow in  $\text{CWatM}_{\text{base}}$ . Only in upstream grid cells with glacier cover, the evapotranspiration in  $\text{CWatM}_{\text{base}}$  is higher because OGGM assumes no evapotranspiration on glaciers.

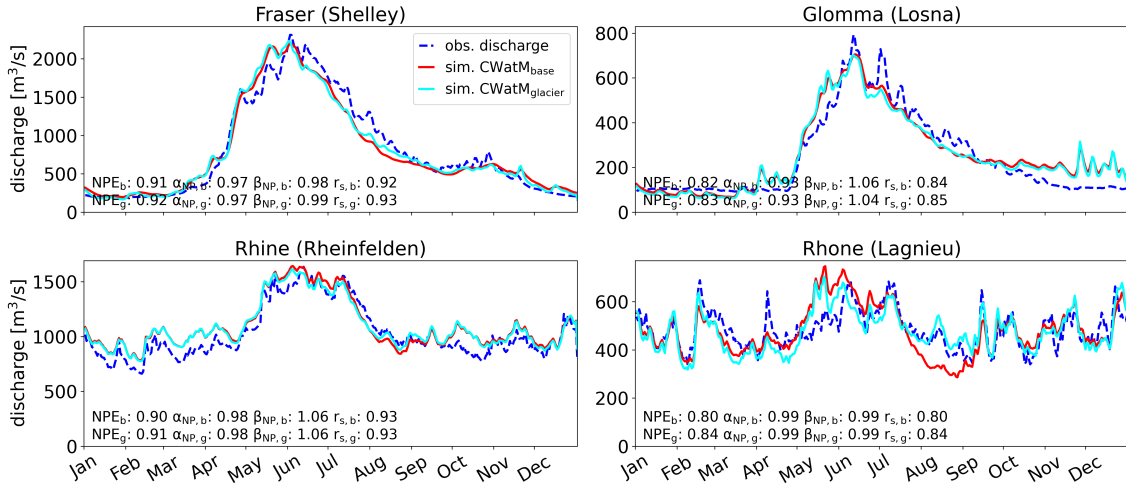

Figure S4: Mean hydrographs of the evaluation period (1990–1999) for the upstream station of the study basins. As insert the NPE and its error components over the whole evaluation period are given for  $\text{CWatM}_{\text{base}}$  (index b) and  $\text{CWatM}_{\text{glacier}}$  (index g) ( $\alpha_{NP}$ : variability,  $\beta_{NP}$ : mean,  $r_s$ : dynamics; Pool et al., 2018). Values closer to 1 indicate a better match.

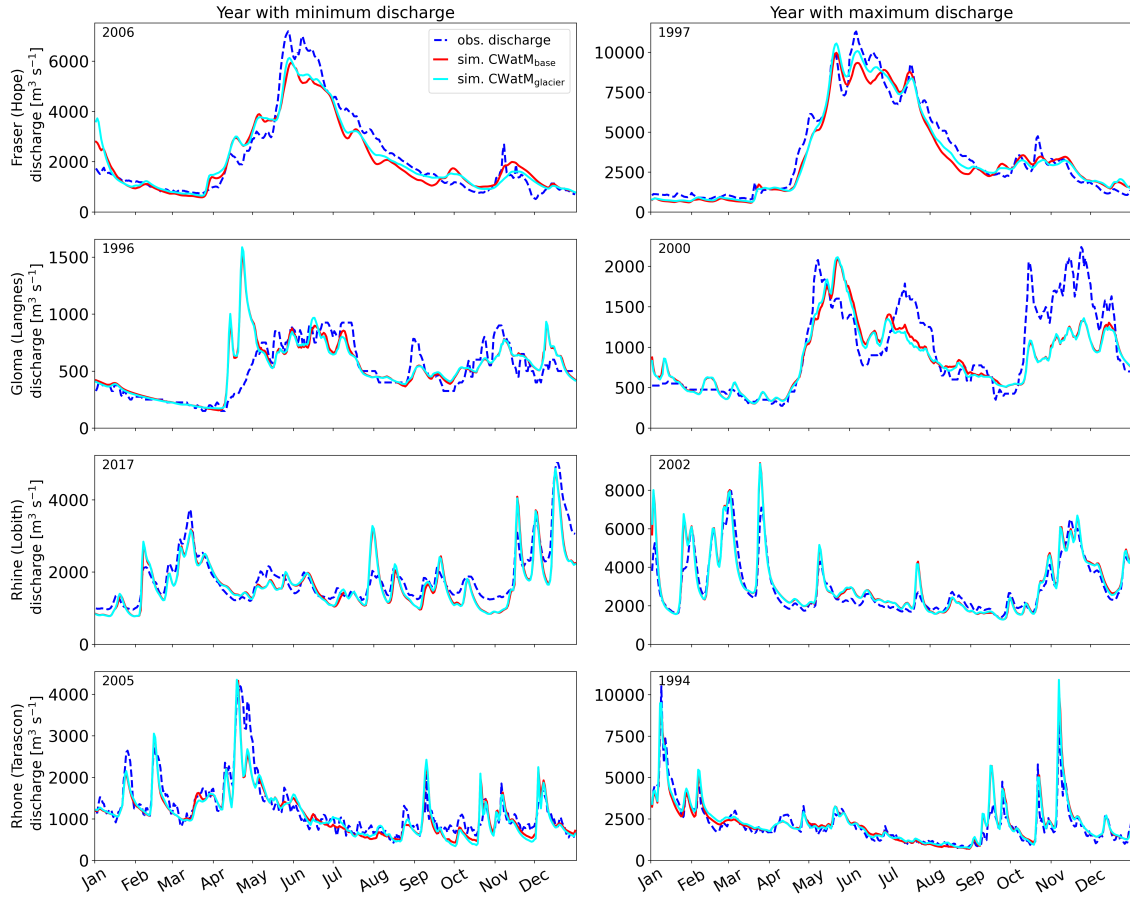

Figure S5: Hydrographs of the year with minimum and maximum annual discharge sum during the 30-year period 1990–2019 for the downstream stations of the study basins. Years 2000 or later fall within the calibration period. For the Rhone, the year with the second smallest discharge was chosen as the minimum year, because for the year with the lowest discharge, no observational data was available.

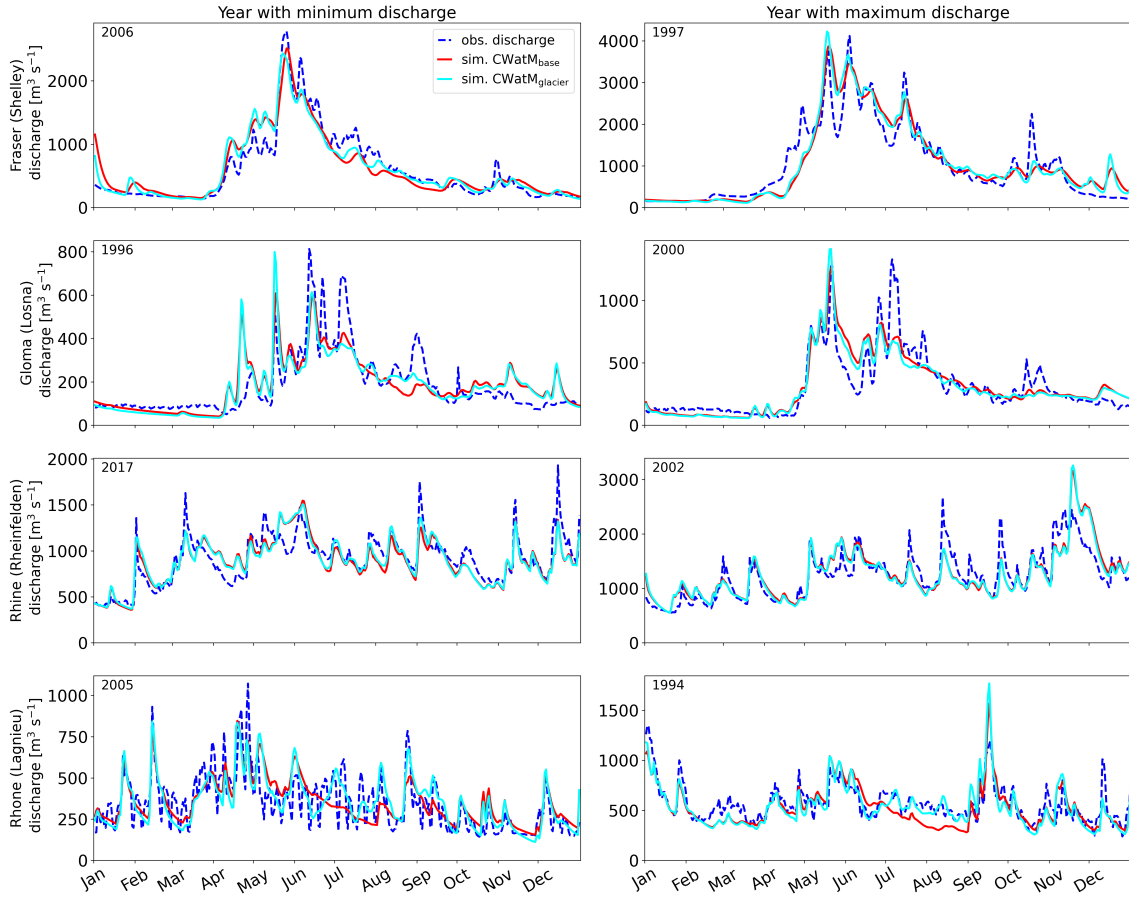

Figure S6: Hydrographs of the year with minimum and maximum annual discharge sum for the upstream stations of the study basins. For the Rhone, the year with the second smallest discharge was chosen as the minimum year, because for the year with the lowest discharge, no observational data was available.

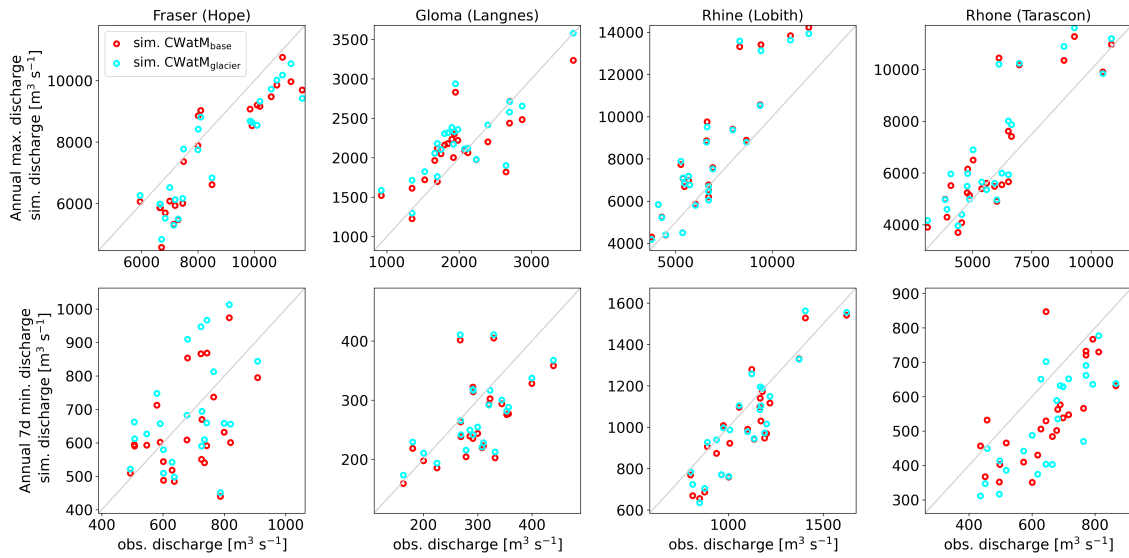

Figure S7: Simulated against observed annual minimum and maximum discharge of the 30 years in the past (1990–2019). The different colours refer to CWatM<sub>base</sub> and CWatM<sub>glacier</sub>.

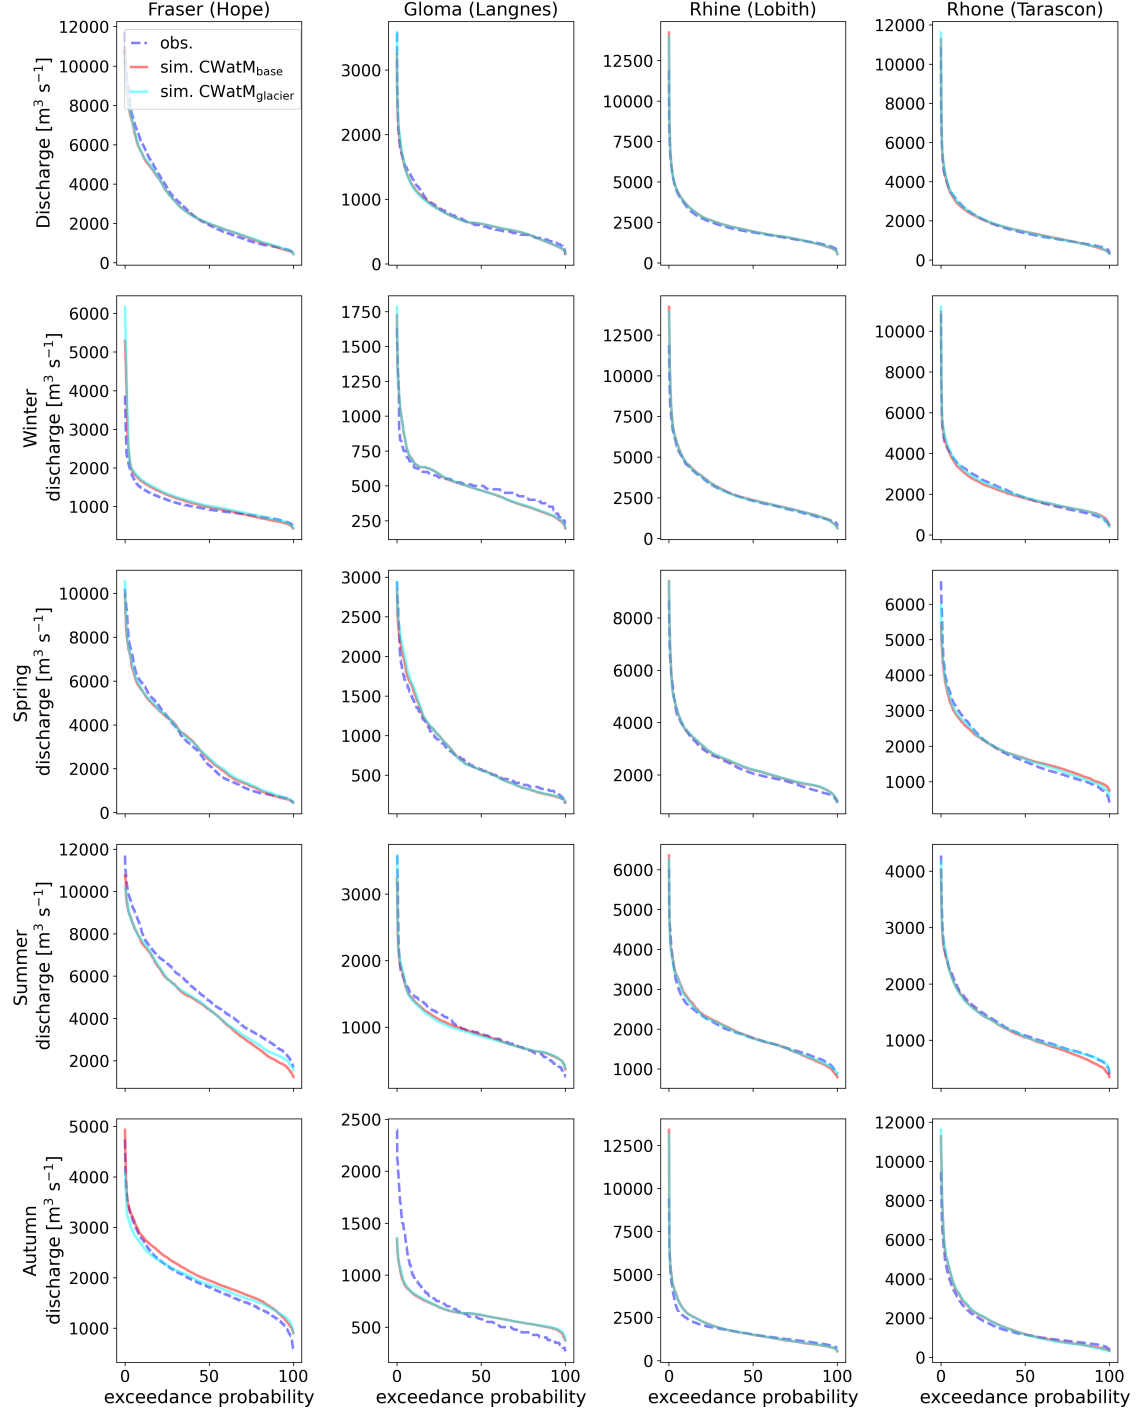

Figure S8: Comparison of flow duration curves of discharge data from 1990 until the last year of available observations (Fraser: 2016, Gloma and Rhine: 2018, Rhone: 2014). Over the whole period (first row) and split by seasons (Winter:Dec-Feb, Spring:Mar-May, Summer:Jun-Aug, Autumn:Sep-Nov)

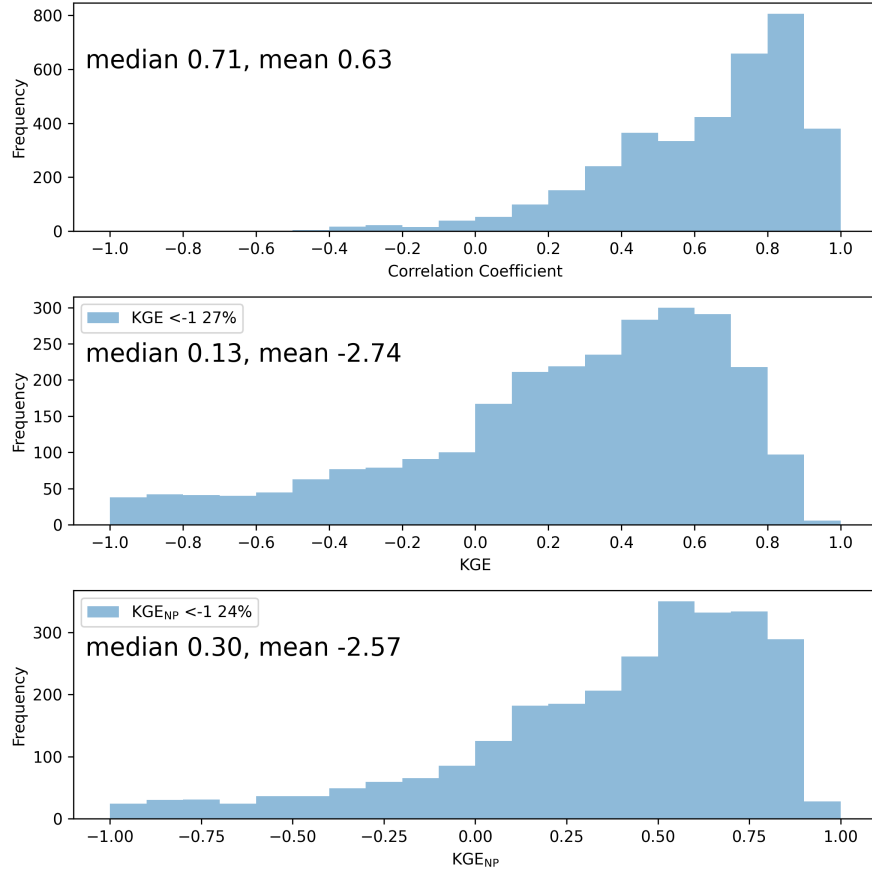

Figure S9: Histograms of performance of six global parameter sets: Correlation coefficient, KGE and the non-parametric version of the KGE ( $KGE_{NP}$ ) of monthly discharge. The mean and median values are annotated as well as the percentage of gauges with KGE and  $KGE_{NP}$  below -1.

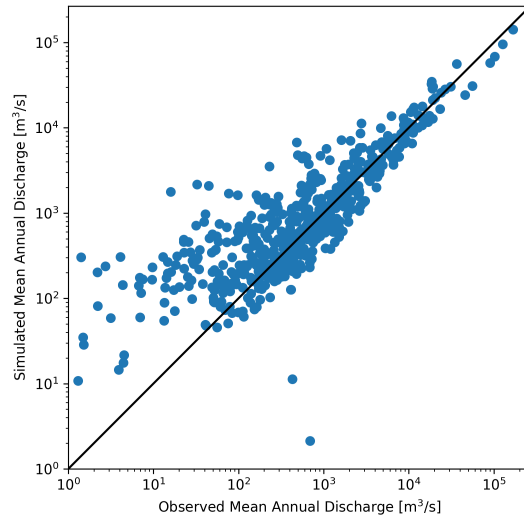

Figure S10: Simulated compared to observed mean annual discharge at gauges used for calibration for the time period 1990–2019. The ensemble mean of simulations with six parameter sets is used.

## S3 Future changes in study basins (5 arcmin)

### S3.1 Estimating median temperature increase compared to pre-industrial levels

For estimating median temperature increases of 2070–2099 compared to the pre-industrial era, we used the estimates of past temperature increases from the IPCC AR6 report (Figure 1.12 IPCC, 2021). This shows that the temperature increase in the period 1986–2005 was  $0.69^{\circ}\text{C}$  and in 1995–2014  $0.85^{\circ}\text{C}$  compared to pre-industrial levels. We thus calculated the global mean temperature for the same periods with our meteorological data and the median global temperature of all GCMs for the period 2070–2099. We then derived the median temperature increase compared to pre-industrial levels. This was  $1.96^{\circ}\text{C}$  for SSP1-2.6 and  $4.25^{\circ}\text{C}$  for SSP5-8.5 for using the period 1986–2005, and  $1.98^{\circ}\text{C}$  and  $4.26^{\circ}\text{C}$  using the period 1995–2014, respectively. Thus, we rounded the temperature increase in our manuscript to  $2.0^{\circ}\text{C}$  and  $4.3^{\circ}\text{C}$ .

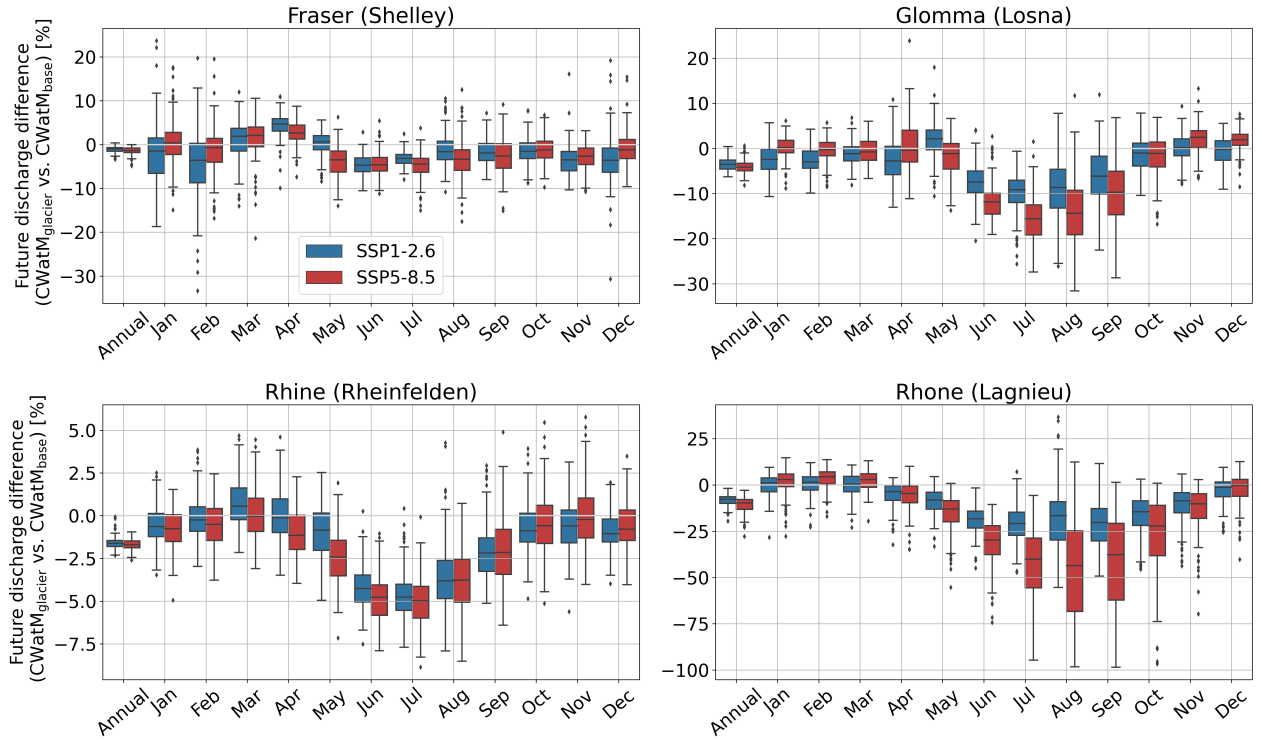

Figure S11: Relative difference in mean annual and mean monthly discharge of  $\text{CWatM}_{\text{glacier}}$  compared to  $\text{CWatM}_{\text{base}}$  at the upstream gauges for 30 years from 2070–2099, shown per SSP scenario which translate into warming levels of  $+1.9^{\circ}\text{C}$  and  $+4.2^{\circ}\text{C}$  compared to pre-industrial time.

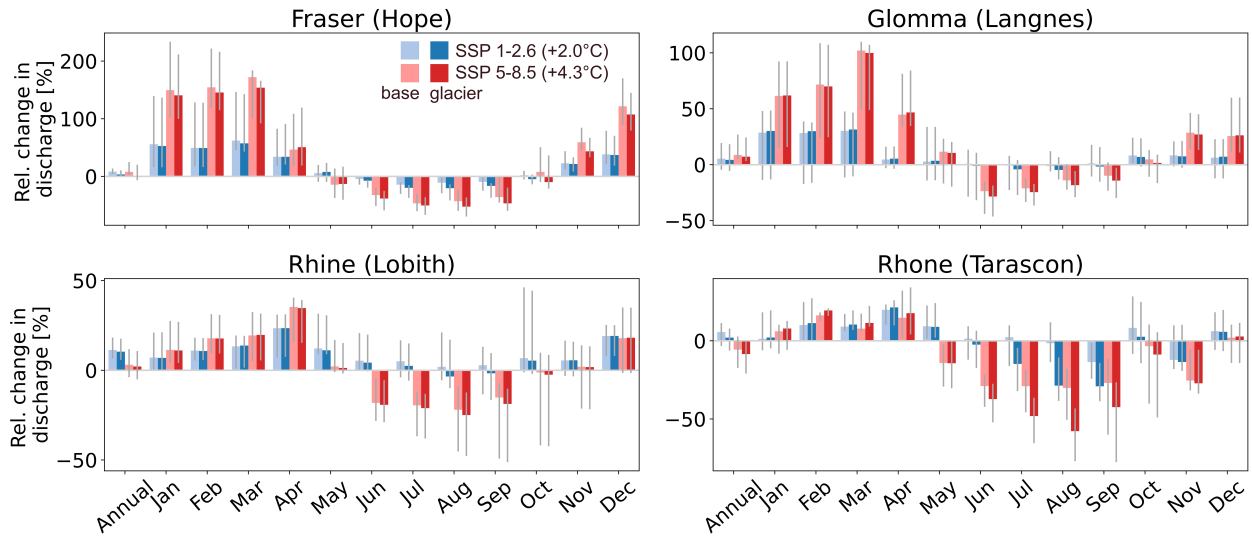

Figure S12: Relative change in mean annual and mean monthly discharge at the downstream stations for the period 2070–2099 compared to 1990–2019 for CWatM<sub>base</sub> and CWatM<sub>glacier</sub>, shown per SSP scenario which translate into warming levels of +1.9°C and +4.2°C compared to pre-industrial time. The height of the bar indicates median change of GCMs and the grey lines indicate the maximum and minimum change of GCMs.

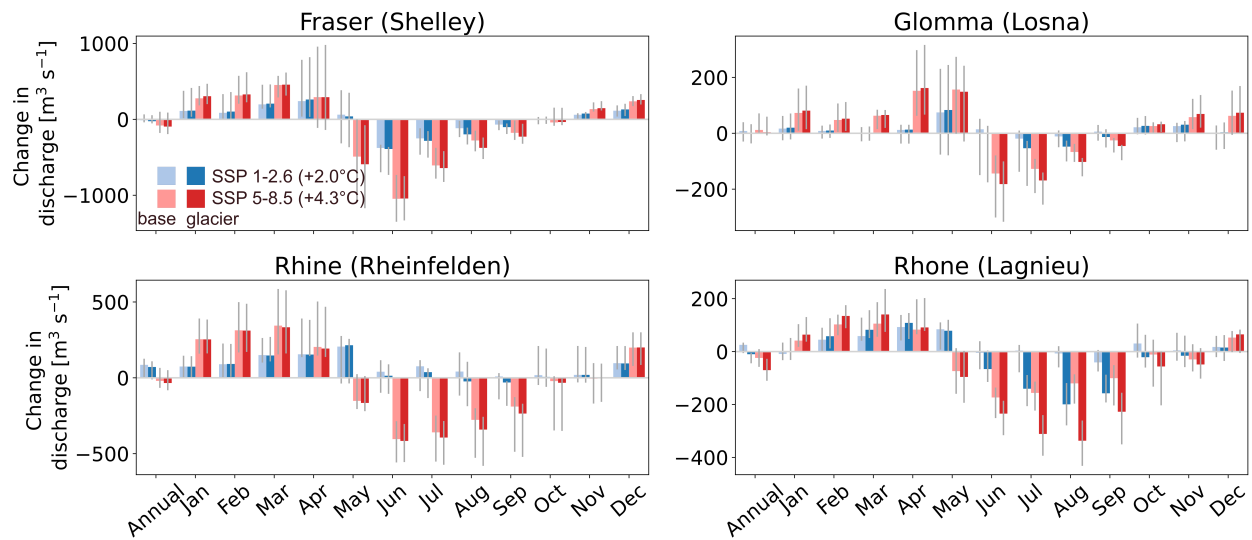

Figure S13: Absolute change in mean annual and mean monthly discharge at the upstream stations for the period 2070–2099 compared to 1990–2019 for CWatM<sub>base</sub> and CWatM<sub>glacier</sub>, shown per SSP scenario which translate into warming levels of +1.9°C and +4.2°C compared to pre-industrial time. The height of the bar indicates median change of GCMs and the grey lines indicate the maximum and minimum change of GCMs.

## S4 Changes in glacier volume, melt and glacier contribution to runoff

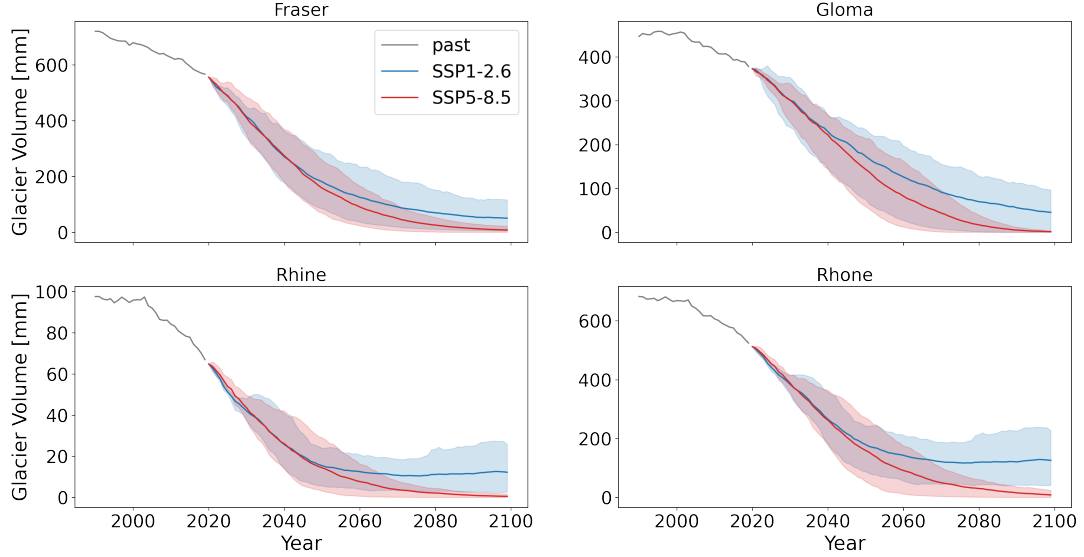

Figure S14: Glacier volumes for the selected rivers simulated with OGGM, shown as water equivalent per total river basin area [mm], per SSP scenario which translate into mean warming levels of +1.9°C and +4.2°C compared to pre-industrial time. Shaded area shows the total range of the five GCMs.

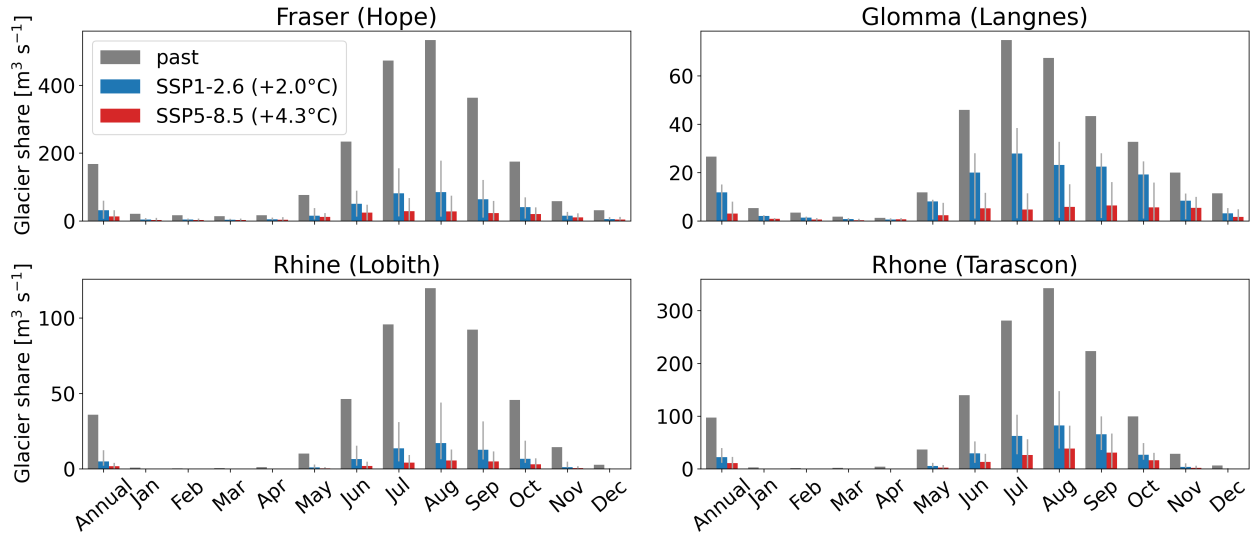

Figure S15: Absolute mean glacier contribution to annual and monthly discharge at the downstream gauge for the period 1990–2019 and for the period 2070–2099 for two SSP scenarios which translate into warming levels of +1.9°C and +4.2°C compared to pre-industrial time. The height of the bar indicates median change of GCMs and the grey lines indicate the maximum and minimum change of GCMs. Glacier contribution is estimated by subtracting  $CW_{atM_{glacier,bare}}$  from  $CW_{atM_{glacier}}$ .

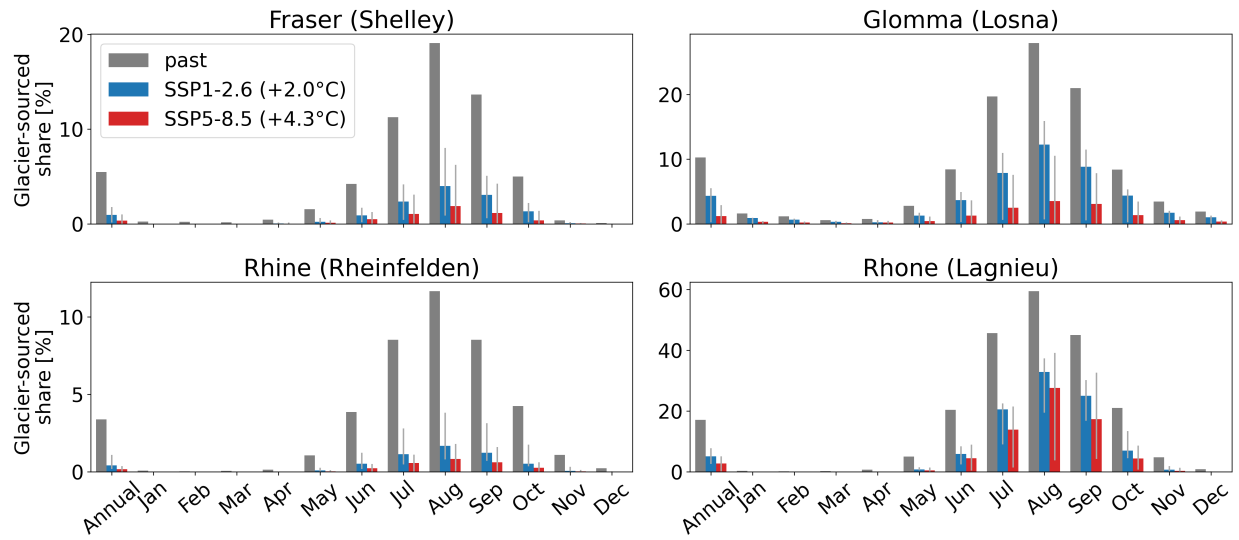

Figure S16: Relative mean glacier contribution to annual and monthly discharge at the upstream gauge for the period 1990–2019 and for the period 2070–2099 for two SSP scenarios which translate into warming levels of +1.9°C and +4.2°C compared to pre-industrial time. The height of the bar indicates median change of GCMs and the grey lines indicate the maximum and minimum change of GCMs. Glacier contribution is estimated by subtracting  $CW_{atM_{glacier,bare}}$  from  $CW_{atM_{glacier}}$ .

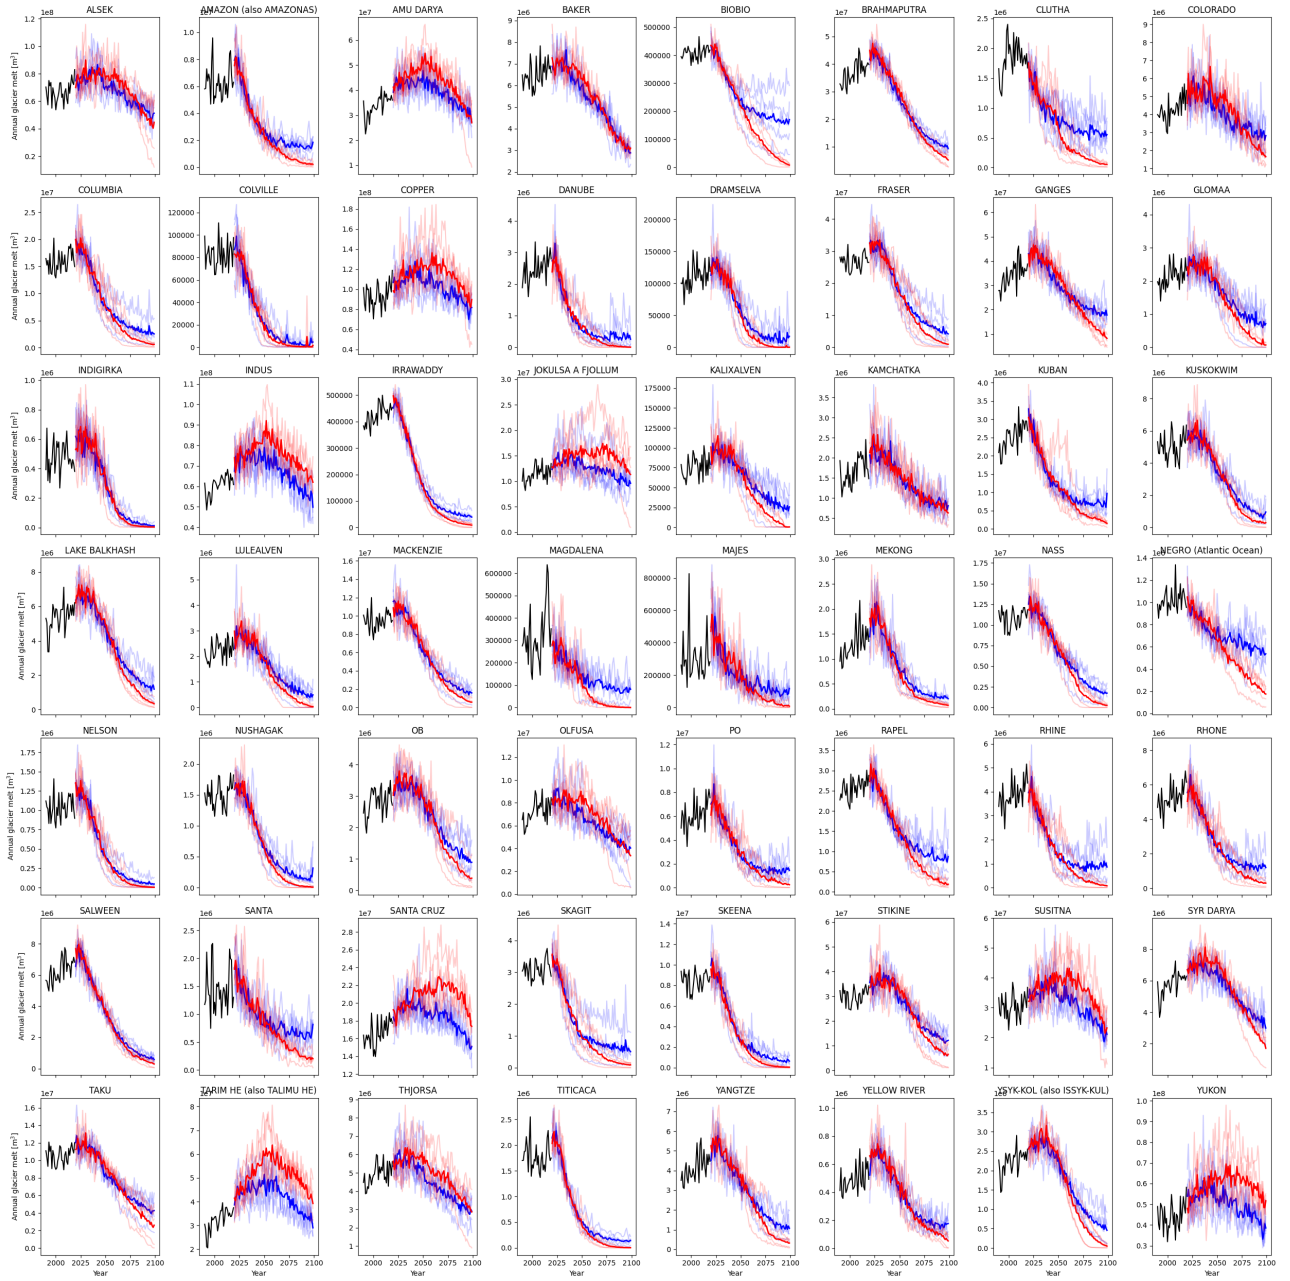

Figure S17: Simulated glacier-sourced melt volumes in the 56 glacierized river basins in the period 1990–2100. For future projections, the thick lines show multi-GCM means and thin lines denote individual GCMs results for SSP1-2.6 (blue) and SSP5-8.5 (red). Black line shows the past period (1990–2019)

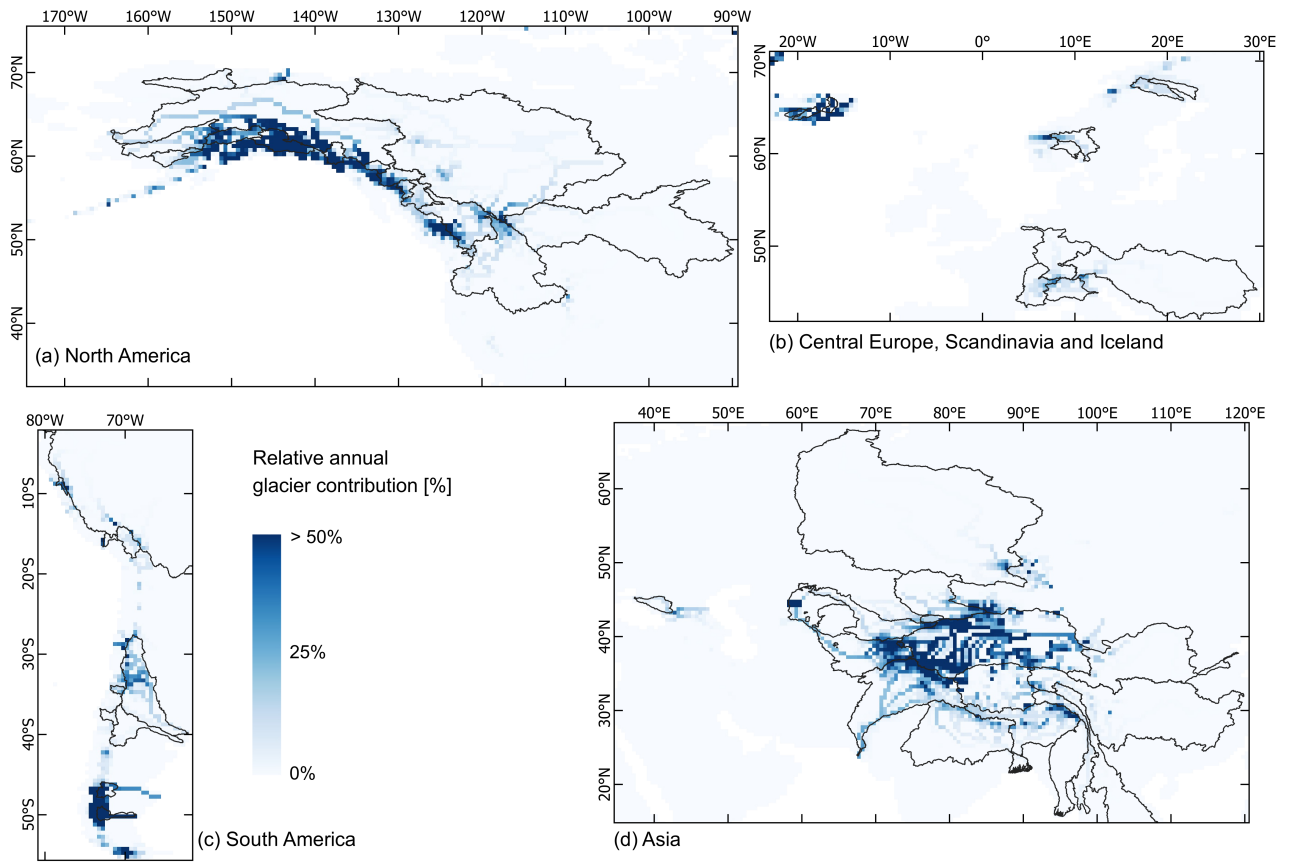

Figure S18: Relative mean glacier-sourced contribution to annual discharge for the period 1990–2019. Glacier-sourced melt comprises all melt on glaciers. Glacier contribution is estimated by subtracting  $CW_{atM_{glacier,bare}}$  from  $CW_{atM_{glacier}}$ .

## S5 Effects of coupling globally (30 arcmin)

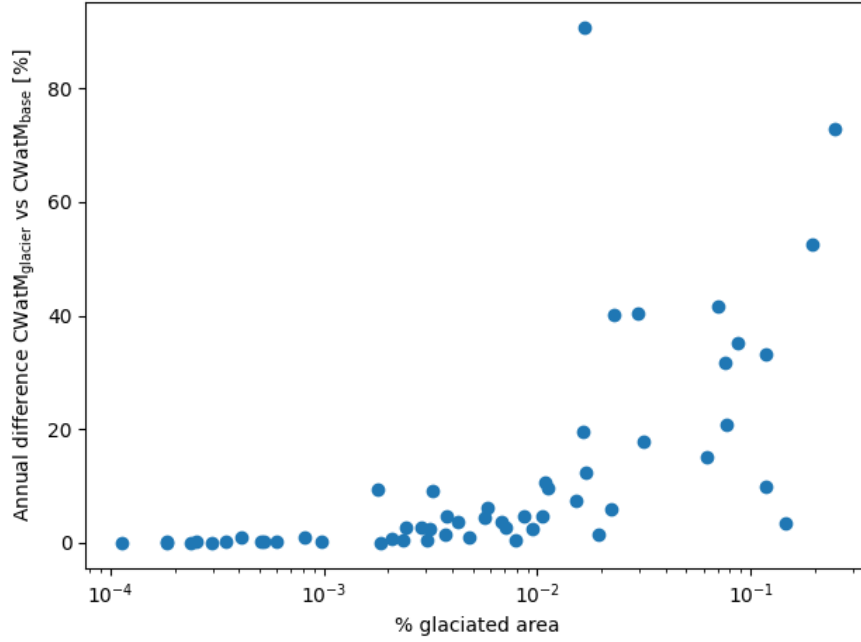

Figure S19: Relative difference in mean annual discharge between CWatM<sub>glacier</sub> and CWatM<sub>base</sub> at the outlet of 56 glacierized river basin with positive difference indicating larger discharge of CWatM<sub>glacier</sub> plotted against percentage of glacier area in basin. The Santa Cruz river basin is not shown here because of very high relative differences due to low discharge.

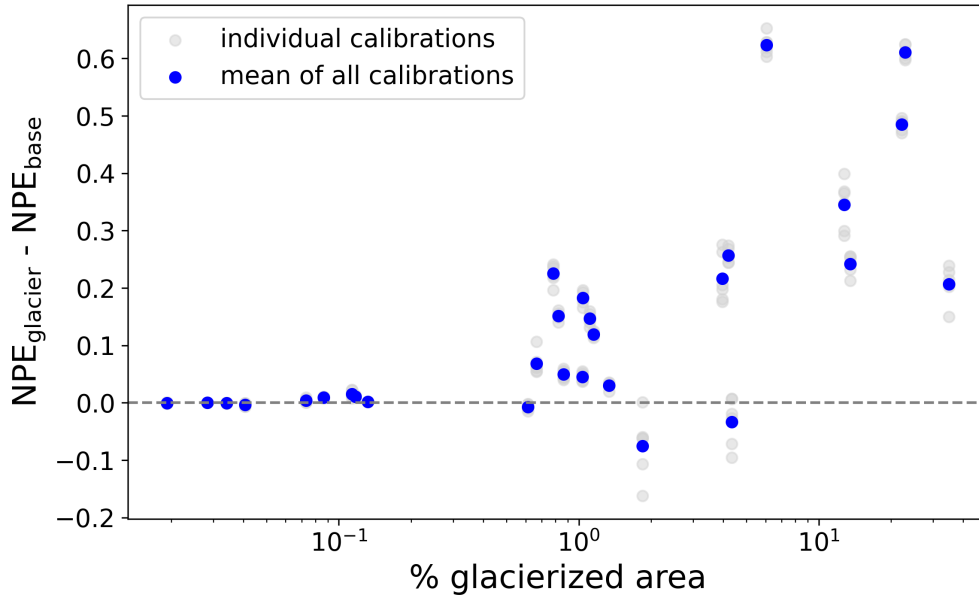

Figure S20: The performance difference between CWatM<sub>glacier</sub> and CWatM<sub>base</sub> compared to the glacier coverage. The data is the same as for Fig. 7. Results are shown for individual calibrations (grey dots) and mean of all calibrations (blue dots) for the 10 year period 2004 to 2013.

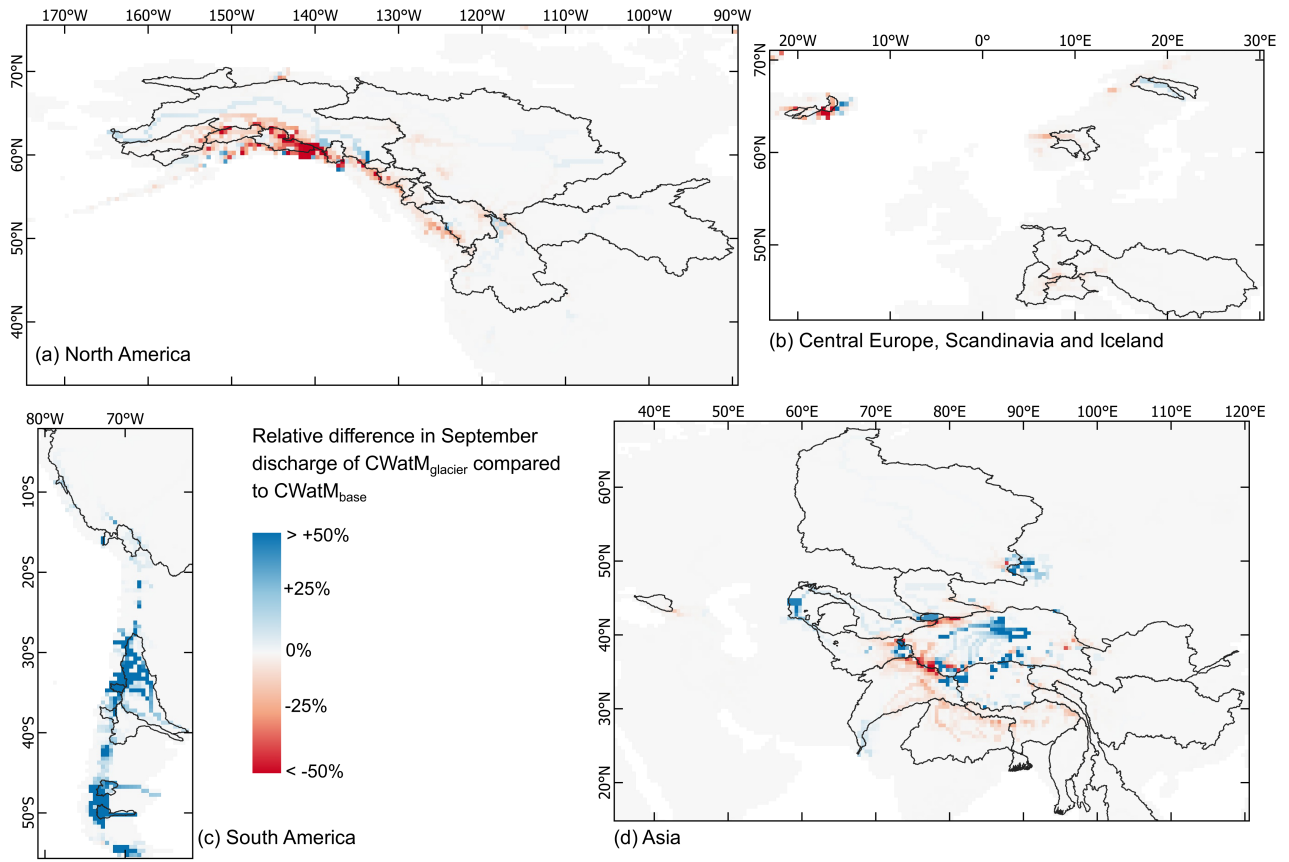

Figure S21: Relative difference in average discharge in March (1990–2019) between  $CWatM_{glacier}$  and  $CWatM_{base}$ . Positive values indicate larger discharge of  $CWatM_{glacier}$ . The major glaciated river basins are shown in black.

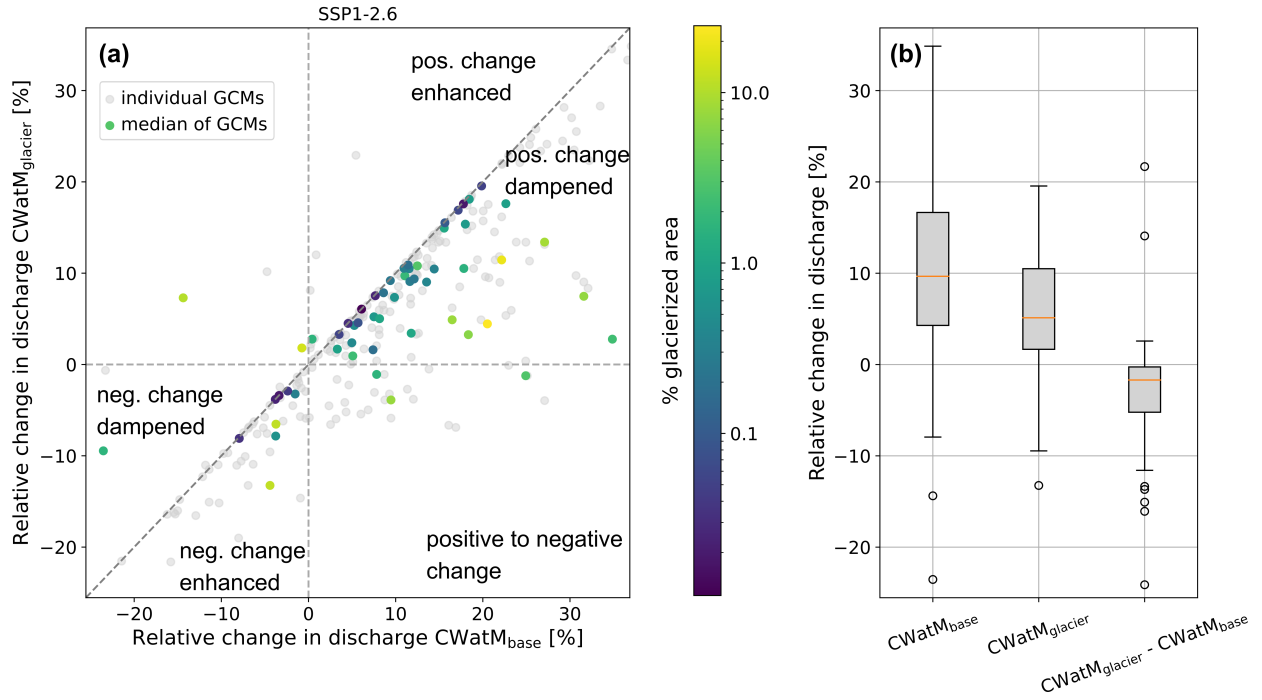

Figure S22: Comparison of relative future change for annual discharge at end of the 21<sup>st</sup> century for CWatM<sub>base</sub> and CWatM<sub>glacier</sub> for 56 glacierized river basins for SSP1-2.6. (a) Colored dots show the median of all GCMs and grey dots show individual GCMs. (b) Boxplots showing the relative future change of all basins for CWatM<sub>base</sub> and CWatM<sub>glacier</sub> and their difference.

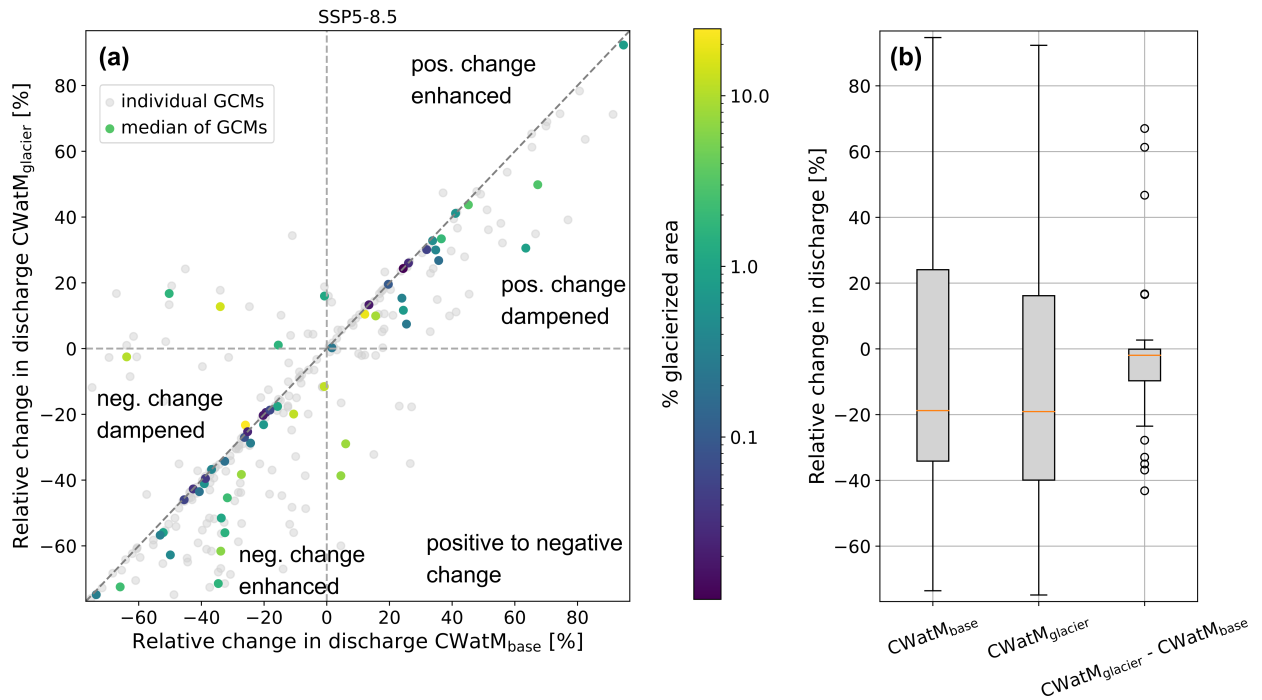

Figure S23: Comparison of relative future discharge change for the month with largest glacier-sourced melt contribution in the past at end of the 21<sup>st</sup> century for CWatM<sub>base</sub> and CWatM<sub>glacier</sub> for 56 glacierized river basins for SSP5-8.5. (a) Colored dots show the median of all GCMs and grey dots show individual GCMs. (b) Boxplots showing the relative future change of all basins for CWatM<sub>base</sub> and CWatM<sub>glacier</sub> and their difference.

## S6 Influence of Precipitation Factor

The precipitation correction is handled differently in OGGM and CWatM as explained in Section 2.3 of the main paper. This difference in precipitation correction between OGGM and CWatM led to a larger precipitation input for CWatM<sub>glacier</sub> compared to CWatM<sub>base</sub> as discussed in Section 6.2.1.

The additional snowfall ( $S_{add}$ ) on glaciers resulting from a precipitation factor larger than one is obtained from OGGM model output (snowfall<sub>on</sub>,  $S$ ). Snowfall on glaciers was post-processed similar to melt and rain on glaciers to obtain results per grid cells.

$$S_{add} = S/p_f \cdot (p_f - 1) \quad (S3)$$

The difference in precipitation input was assessed by comparing the precipitation/snowfall of CWatM<sub>base</sub> ( $P_{base}$ ) to the sum of precipitation input of CWatM<sub>base</sub> and additional snowfall on the glaciers ( $S_{add}$ ).

The precipitation input was summed across each of the 56 glacierized river basins using zonal statistics. It was repeated for a precipitation factor of  $p_f = 1$ ,  $p_f = 2$  and  $p_f = 3$  (Fig. S24). Differences between CWatM<sub>glacier</sub>,  $p_f = 1$  and CWatM<sub>base</sub> are marginal for most basins, suggesting that the impact of differences in mountainous terrain representations in the two models (discussed in Section 6.2.3) is low in most basins. Precipitation input differences between CWatM<sub>glacier</sub> and CWatM<sub>base</sub> increase with increasing  $p_f$  and are larger for snowfall. The mean difference over all basins was +5% for total precipitation and +17% for snowfall for the past period for  $p_f = 3$ . This shows that the difference at basin level is much lower than the difference at glacier locations, for which the snowfall input in OGGM is three times as high as in CWatM.

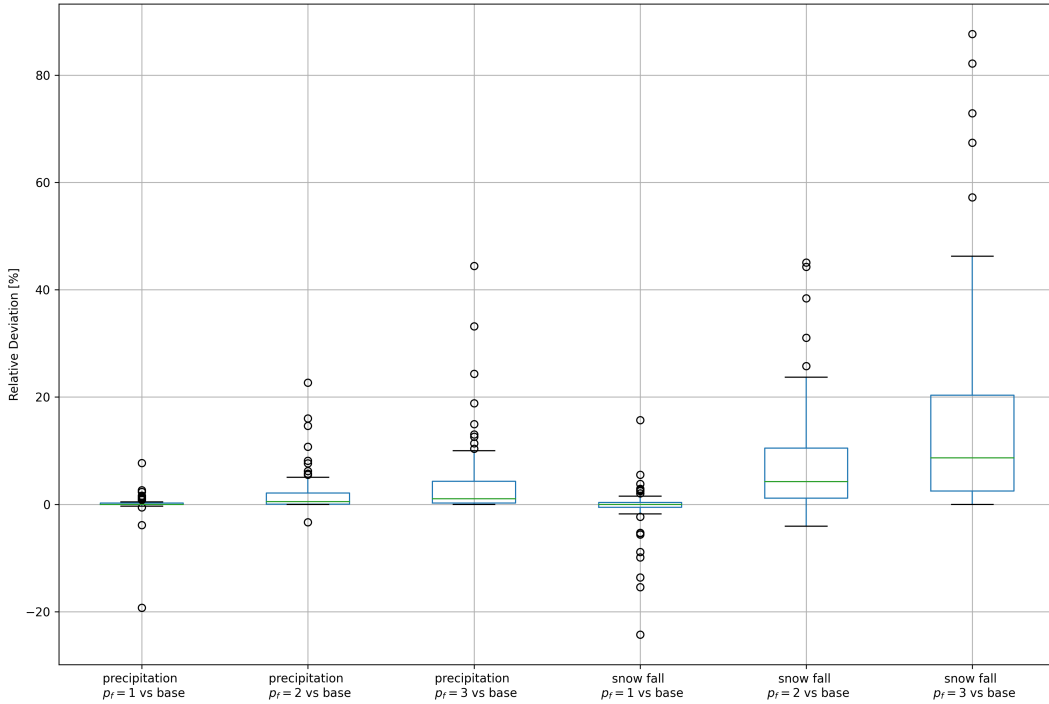

Figure S24: Boxplots of difference in precipitation and snowfall input across the 56 glacierized river basins between CWatM<sub>glacier</sub> with different precipitation factors ( $p_f$ ) and CWatM<sub>base</sub> (base) for annual averages for the period 1990–2019. Each boxplot is based on 56 data points.

We also ran additional simulations with CWatM<sub>base</sub> using  $P_{base} + S_{add}$  as input to investigate whether the performance improvement of CWatM<sub>glacier</sub> compared to CWatM<sub>base</sub> can be attributed to increased precipitation input. The results show that the performance of CWatM<sub>base</sub> is higher with the increased precipitation input (Fig. S25). However, this is not sufficient to explain the performance increase for CWatM<sub>glacier</sub> (Fig. S26). This reaffirms that including glaciers in CWatM improves its performance.

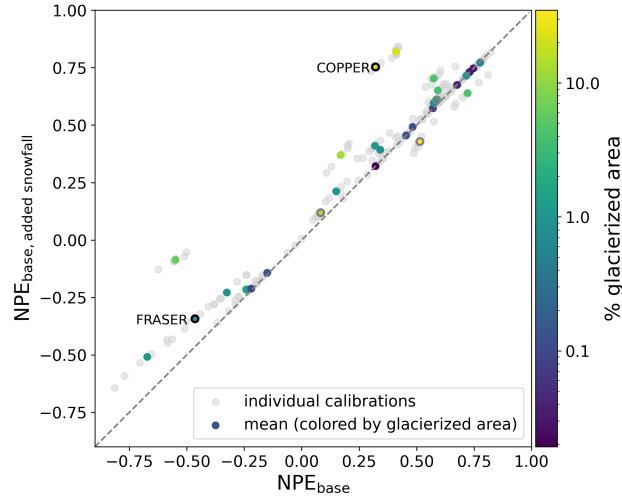

Figure S25: Performance comparison using same discharge stations as presented in Wiersma et al. (2022) between  $\text{CWatM}_{\text{base}}$  and  $\text{CWatM}_{\text{base}}$  with increased precipitation input ( $P_{\text{base}} + S_{\text{add}}$ ) for individual calibrations (grey dots) and mean of all calibrations (coloured dots) for the 10 year period 2004 to 2013. The performance metric used is NPE (Pool et al., 2018). The Santa Cruz River basin lies outside the figure boundaries. Dots with grey outlines show basins smaller than 10,000 km<sup>2</sup>.

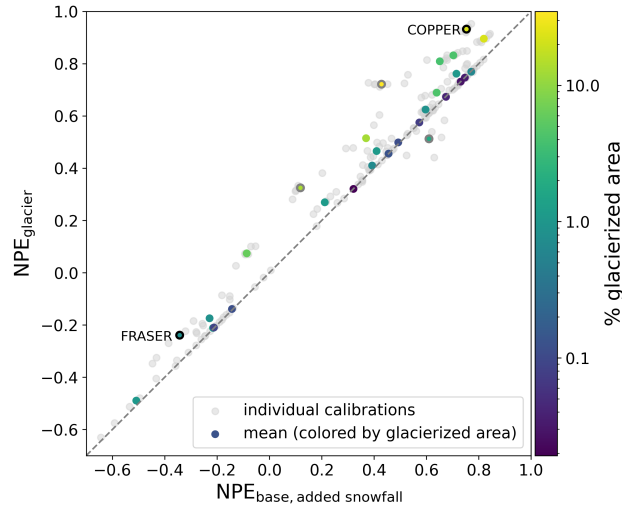

Figure S26: Performance comparison using same discharge stations as presented in Wiersma et al. (2022) between  $\text{CWatM}_{\text{base}}$  with increased precipitation input ( $P_{\text{base}} + S_{\text{add}}$ ) and  $\text{CWatM}_{\text{glacier}}$  for individual calibrations (grey dots) and mean of all calibrations (coloured dots) for the 10 year period 2004 to 2013. The performance metric used is NPE (Pool et al., 2018). The Santa Cruz River basin lies outside the figure boundaries. Dots with grey outlines show basins smaller than 10,000 km<sup>2</sup>.

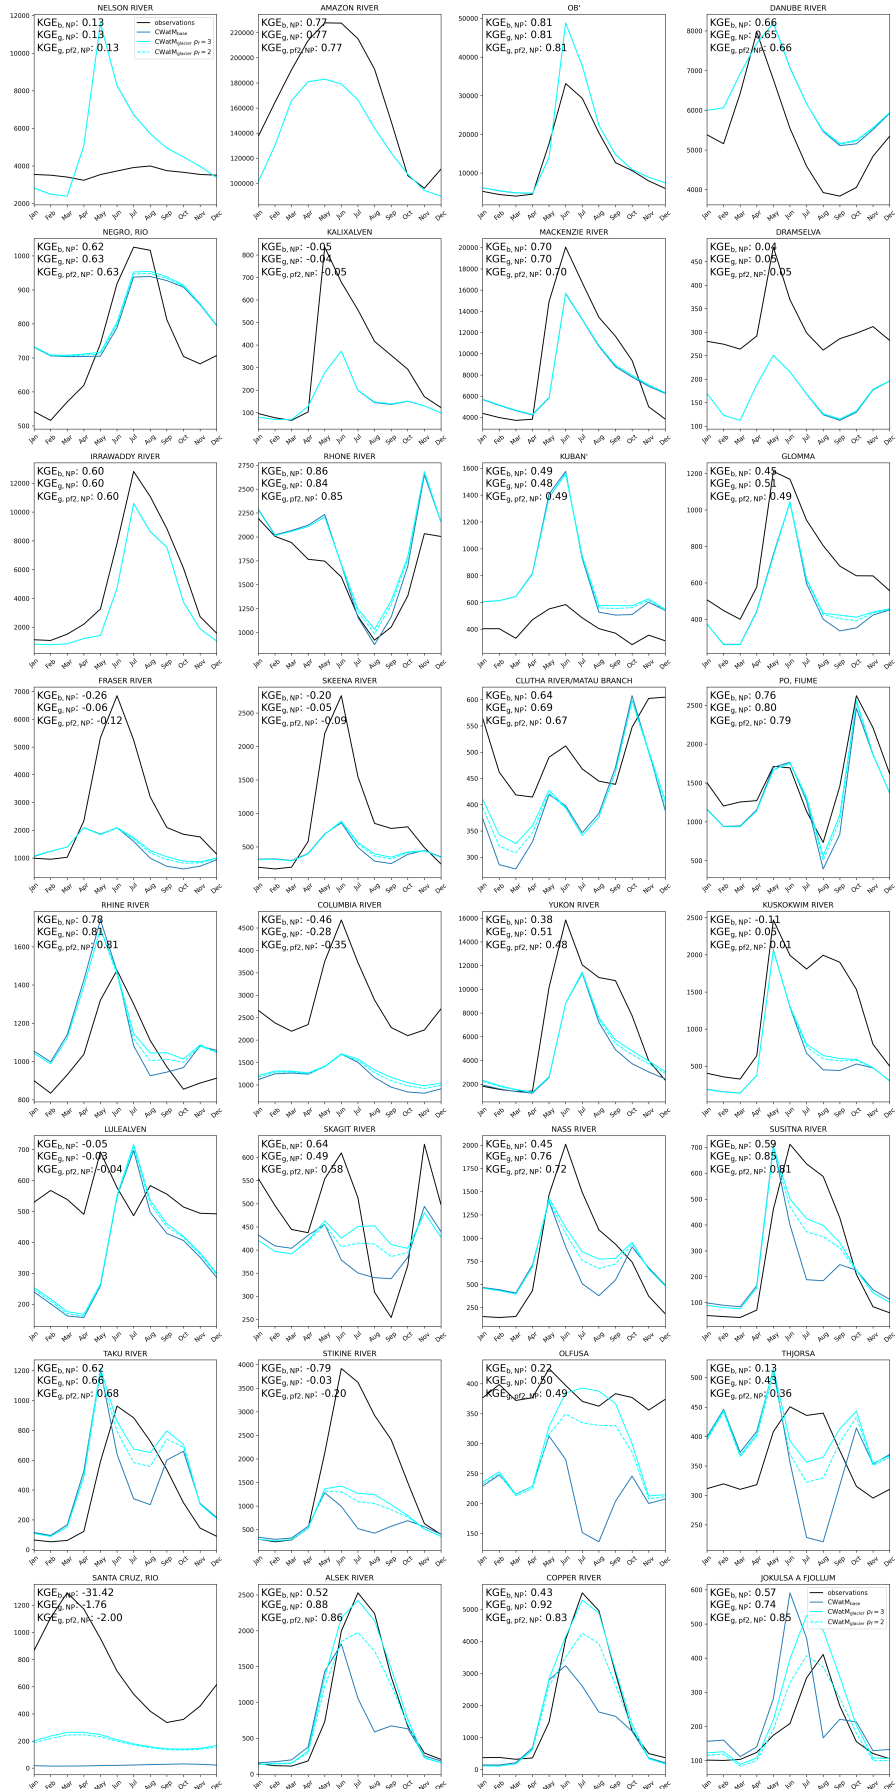

Figure S27: Comparison of mean monthly discharge between 1990–2019 of observations and simulations by CWatM<sub>base</sub> and CWatM<sub>glacier</sub> using the global parameter set used in ISIMIP3 simulations and a globally fixed precipitation factor of 2 and 3 to show the effect on hydrological simulations.

**S7    Glacier location in modelling grid**

Table S1: Area of basins, glacier coverage and contributing glacier melt derived from shapefiles of upstream basin area at most downstream discharge stations at 30 arcmin, 5 arcmin and 100 m resolution for 46 basins for which data was available from Burek and Smilovic (2022). Station No. refers to the GRDC station ID. Glacier melt is derived as summed annual mean glacier runoff (1990–2019) from OGM simulations using all glaciers with terminus inside the shapefile corresponding to the respective resolution. The last three columns show the agreement of the 30 arcmin/5 arcmin resolution with the 100 m resolution.

| Station No. | River Basin   | Area [km2] |         |         | Glacier area [km2] |         |       | Glacier cover [%] |         |       | No. glaciers |         |       | Glacier melt [m3/s] |         |        | Area <sub>rel,100m</sub> |         |       | Glacier area <sub>rel,100m</sub> |         |       | Glacier melt <sub>rel,100m</sub> |         |       |
|-------------|---------------|------------|---------|---------|--------------------|---------|-------|-------------------|---------|-------|--------------|---------|-------|---------------------|---------|--------|--------------------------|---------|-------|----------------------------------|---------|-------|----------------------------------|---------|-------|
|             |               | 30arcmin   | 5arcmin | 100m    | 30arcmin           | 5arcmin | 100m  | 30arcmin          | 5arcmin | 100m  | 30arcmin     | 5arcmin | 100m  | 30arcmin            | 5arcmin | 100m   | 30arcmin                 | 5arcmin | 100m  | 30arcmin                         | 5arcmin | 100m  | 30arcmin                         | 5arcmin | 100m  |
| 4105710     | COPPER        | 61714      | 63211   | 63435   | 14134              | 13810   | 13962 | 22.9              | 21.85   | 22.01 | 3224         | 3157    | 3170  | 2837.6              | 3451.9  | 3481.5 | 0.996                    | 0.996   | 1     | 1.012                            | 0.989   | 0.989 | 0.815                            | 0.992   | 0.992 |
|             |               | 31151      | 28641   | 28650   | 6950               | 5992    | 5995  | 22.31             | 20.92   | 20.92 | 1574         | 1441    | 1424  | 1282                | 1225.1  | 1256.2 | 1.087                    | 1       | 1.159 | 0.999                            | 1.021   | 0.975 | 1.021                            | 0.975   |       |
|             |               | 15966      | 17113   | 17029   | 3529               | 3220    | 3098  | 22.1              | 18.82   | 18.19 | 477          | 490     | 457   | 302.6               | 289.7   | 294.3  | 0.938                    | 1.005   | 1     | 1.139                            | 1.039   | 1.028 | 0.984                            | 1.039   | 0.984 |
| 4105800     | SUSTINA       | 54380      | 49950   | 49845   | 4216               | 4355    | 4358  | 7.75              | 8.72    | 8.74  | 1283         | 1249    | 1272  | 407.8               | 438.7   | 446.7  | 1.091                    | 1.002   | 0.967 | 0.999                            | 0.913   | 0.982 | 0.999                            | 0.982   |       |
| 3186500     | BAKER         | 14926      | 22435   | 22861   | 1717               | 1710    | 1715  | 11.84             | 7.62    | 7.5   | 1162         | 1474    | 1524  | 154                 | 262.2   | 267.9  | 0.653                    | 0.981   | 1.03  | 0.997                            | 0.575   | 0.979 | 0.997                            | 0.979   |       |
| 4204900     | STIKINE       | 51387      | 50707   | 50658   | 3113               | 3460    | 3552  | 6.06              | 6.82    | 7.01  | 2179         | 2241    | 2290  | 387                 | 516.4   | 534.5  | 1.014                    | 1.001   | 0.876 | 0.974                            | 0.724   | 0.966 | 0.974                            | 0.966   |       |
| 4245100     | NASS          | 18982      | 18740   | 18377   | 753                | 1317    | 1234  | 3.97              | 7.03    | 6.71  | 796          | 791     | 741   | 145.2               | 213.9   | 221.5  | 1.033                    | 1.02    | 0.61  | 1.067                            | 0.656   | 0.966 | 1.067                            | 0.966   |       |
| 4206601     | TAKU          | 17655      | 17017   | 16860   | 765                | 1190    | 1023  | 4.33              | 7       | 6.07  | 414          | 616     | 593   | 143.4               | 327.5   | 285.1  | 1.047                    | 1.009   | 0.748 | 0.748                            | 1.163   | 0.503 | 1.149                            | 1.149   |       |
| 2335950     | INDUS         | 821086     | 834863  | 833842  | 25876              | 27359   | 27042 | 3.15              | 3.28    | 3.24  | 22384        | 22991   | 22795 | 706                 | 720     | 725.9  | 0.985                    | 1.001   | 0.957 | 1.012                            | 0.973   | 0.992 | 0.992                            | 0.992   |       |
| 3948300     | SANTA         | 15301      | 11988   | 11951   | 325                | 363     | 349   | 2.12              | 3.03    | 2.92  | 399          | 426     | 405   | 17.2                | 20.5    | 19.1   | 1.28                     | 1.003   | 0.931 | 1.04                             | 0.901   | 1.076 | 1.076                            | 1.076   |       |
| 2817100     | AMU DARYA     | 451358     | 372771  | 372568  | 9695               | 9724    | 9789  | 2.15              | 2.61    | 2.63  | 11854        | 11564   | 11702 | 391.6               | 400.2   | 411.1  | 1.211                    | 1.001   | 0.999 | 0.993                            | 0.953   | 0.973 | 0.973                            | 0.973   |       |
| 2651100     | BRAHMAPUTRA   | 525994     | 514210  | 514170  | 9748               | 10382   | 10506 | 1.85              | 2.02    | 2.04  | 10994        | 11478   | 11430 | 428.8               | 461.6   | 475.7  | 1.023                    | 1       | 0.928 | 0.988                            | 0.901   | 0.97  | 0.97                             | 0.97    |       |
| 3179250     | RAPEL         | 12781      | 13485   | 13503   | 379                | 284     | 235   | 2.97              | 2.11    | 1.74  | 447          | 275     | 238   | 32                  | 26.9    | 26.1   | 0.947                    | 0.999   | 0.613 | 1.209                            | 1.225   | 1.033 | 1.033                            | 1.033   |       |
| 4103200     | YUKON         | 816227     | 821514  | 821207  | 9054               | 10313   | 10356 | 1.11              | 1.26    | 1.26  | 3005         | 3095    | 3082  | 1138.7              | 1364.8  | 1353.9 | 0.994                    | 1       | 0.874 | 0.996                            | 0.841   | 1.008 | 1.008                            | 1.008   |       |
| 4102100     | KUSKOKWIM     | 82259      | 80037   | 80296   | 946                | 894     | 973   | 1.15              | 1.12    | 1.21  | 752          | 817     | 872   | 77.6                | 104.4   | 119.3  | 1.024                    | 0.997   | 0.972 | 0.919                            | 0.651   | 0.875 | 0.875                            | 0.875   |       |
| 6233750     | LULEALVEN     | 24134      | 24460   | 24474   | 322                | 233     | 263   | 1.33              | 0.95    | 1.08  | 243          | 233     | 244   | 27.8                | 20.1    | 28.1   | 0.986                    | 0.999   | 1.224 | 0.886                            | 0.987   | 0.714 | 0.714                            | 0.714   |       |
| 6139100     | RHONE         | 99516      | 94110   | 93590   | 612                | 891     | 916   | 0.61              | 0.95    | 0.98  | 1013         | 1195    | 1177  | 71.9                | 101.7   | 107.6  | 1.063                    | 1.006   | 0.668 | 0.973                            | 0.669   | 0.946 | 0.946                            | 0.946   |       |
| 4207900     | FRASER        | 216641     | 216166  | 216412  | 1694               | 1729    | 1845  | 0.78              | 0.8     | 0.85  | 1912         | 1937    | 1959  | 157.9               | 152     | 178.9  | 1.001                    | 0.999   | 0.918 | 0.937                            | 0.883   | 0.85  | 0.85                             | 0.85    |       |
| 4245254     | SKEENA        | 42158      | 41945   | 41861   | 347                | 366     | 357   | 0.82              | 0.87    | 0.85  | 608          | 601     | 586   | 33.5                | 36.7    | 37.6   | 1.007                    | 1.002   | 0.972 | 1.025                            | 0.892   | 0.978 | 0.978                            | 0.978   |       |
| 2646128     | GAAGES        | 933315     | 945500  | 945040  | 7479               | 8007    | 7831  | 0.8               | 0.85    | 0.83  | 6407         | 6652    | 6559  | 396                 | 445.6   | 455.3  | 0.988                    | 1       | 0.955 | 1.022                            | 0.87    | 0.979 | 0.979                            | 0.979   |       |
| 2314450     | LAKE BALKHASH | 13201      | 13084   | 12970   | 86                 | 122     | 106   | 0.65              | 0.93    | 0.81  | 126          | 185     | 179   | 6                   | 8.4     | 9.2    | 1.018                    | 1.009   | 0.811 | 1.151                            | 0.653   | 0.91  | 0.91                             | 0.91    |       |
| 5868100     | CLUTHA        | 19705      | 20477   | 20572   | 113                | 149     | 149   | 0.58              | 0.73    | 0.73  | 586          | 534     | 651   | 20.9                | 32      | 38.9   | 0.958                    | 0.995   | 0.758 | 1                                | 0.536   | 0.823 | 0.823                            | 0.823   |       |
| 6729400     | GLOMAA        | 41482      | 40356   | 40401   | 277                | 244     | 270   | 0.67              | 0.6     | 0.67  | 313          | 272     | 275   | 24.4                | 24.7    | 27.5   | 1.027                    | 0.999   | 1.026 | 0.904                            | 0.888   | 0.897 | 0.897                            | 0.897   |       |
| 2316201     | SYR DARYA     | 291659     | 335047  | 334279  | 2125               | 1832    | 1868  | 0.73              | 0.55    | 0.56  | 3526         | 3422    | 3353  | 76                  | 79.3    | 85.4   | 0.873                    | 1.002   | 1.138 | 0.981                            | 0.89    | 0.928 | 0.928                            | 0.928   |       |
| 6348000     | PO            | 74041      | 73027   | 72903   | 657                | 381     | 316   | 0.89              | 0.52    | 0.43  | 1139         | 852     | 752   | 85.1                | 52.7    | 64.3   | 1.016                    | 1.002   | 2.079 | 1.206                            | 1.323   | 0.82  | 0.82                             | 0.82    |       |
| 3275750     | COLORADO      | 279679     | 302102  | 301986  | 1144               | 1219    | 1277  | 0.41              | 0.4     | 0.42  | 1336         | 1600    | 1683  | 45.6                | 54.9    | 61     | 0.926                    | 1       | 0.896 | 0.955                            | 0.747   | 0.9   | 0.9                              | 0.9     |       |
| 2902850     | KAMCHATKA     | 52040      | 51567   | 51457   | 235                | 175     | 199   | 0.45              | 0.34    | 0.39  | 175          | 109     | 136   | 18.8                | 15.4    | 17.5   | 1.011                    | 1.002   | 1.181 | 0.879                            | 1.075   | 0.881 | 0.881                            | 0.881   |       |
| 6983350     | KUBAN         | 48666      | 48434   | 47678   | 299                | 129     | 177   | 0.62              | 0.27    | 0.37  | 403          | 214     | 263   | 33.7                | 18.9    | 23.3   | 1.021                    | 1.016   | 1.689 | 0.729                            | 1.448   | 0.812 | 0.812                            | 0.812   |       |
| 4102740     | NUSHAGAK      | 27670      | 25400   | 25287   | 173                | 88      | 84    | 0.63              | 0.35    | 0.33  | 207          | 105     | 105   | 21.8                | 10.7    | 14.3   | 1.094                    | 1.004   | 2.06  | 1.048                            | 1.525   | 0.747 | 0.747                            | 0.747   |       |
| 3179500     | BIOBIO        | 24572      | 24428   | 24221   | 57                 | 74      | 74    | 0.23              | 0.3     | 0.31  | 125          | 158     | 129   | 5.4                 | 6.8     | 7.2    | 1.014                    | 1.009   | 0.77  | 1                                | 0.746   | 0.944 | 0.944                            | 0.944   |       |
| 4115201     | COLUMBIA      | 663329     | 651226  | 651439  | 1854               | 1956    | 1928  | 0.28              | 0.3     | 0.3   | 3519         | 3396    | 3423  | 187.3               | 195.4   | 213    | 1.018                    | 1       | 0.962 | 1.015                            | 0.879   | 0.917 | 0.917                            | 0.917   |       |
| 6435060     | RHINE         | 161933     | 158891  | 159333  | 371                | 329     | 337   | 0.23              | 0.21    | 0.21  | 724          | 730     | 793   | 59.1                | 63.9    | 68.1   | 1.016                    | 0.997   | 1.101 | 0.976                            | 0.867   | 0.939 | 0.939                            | 0.939   |       |
| 6729311     | DRAMSELVA     | 15178      | 16710   | 16928   | 18                 | 45      | 27    | 0.12              | 0.27    | 0.16  | 36           | 48      | 42    | 1.2                 | 6.9     | 5.8    | 0.897                    | 0.987   | 0.667 | 1.667                            | 0.214   | 1.195 | 1.195                            | 1.195   |       |
| 2181900     | YANGTZE       | 1696096    | 1682196 | 1681512 | 1067               | 1597    | 1657  | 0.06              | 0.09    | 0.1   | 1241         | 1535    | 1596  | 47.5                | 72      | 79.8   | 1.009                    | 1       | 0.644 | 0.964                            | 0.595   | 0.902 | 0.902                            | 0.902   |       |
| 4208025     | MACKENZIE     | 1666309    | 1667919 | 1668196 | 1886               | 1430    | 1404  | 0.11              | 0.09    | 0.08  | 2361         | 2051    | 2049  | 107.8               | 89.5    | 89     | 0.999                    | 1       | 1.343 | 1.019                            | 1.211   | 1.006 | 1.006                            | 1.006   |       |
| 4101500     | COLVILLE      | 58255      | 58363   | 58146   | 20                 | 34      | 36    | 0.03              | 0.06    | 0.06  | 76           | 118     | 117   | 0.9                 | 1.6     | 1.6    | 1.002                    | 1.004   | 0.556 | 0.944                            | 0.594   | 1.001 | 1.001                            | 1.001   |       |
| 2903981     | INDIGIRKA     | 307204     | 304604  | 304575  | 124                | 141     | 145   | 0.04              | 0.05    | 0.05  | 266          | 287     | 300   | 5.4                 | 6.2     | 6.6    | 1.009                    | 1       | 0.855 | 0.972                            | 0.816   | 0.95  | 0.95                             | 0.95    |       |
| 6742900     | DANUBE        | 783930     | 790272  | 785184  | 230                | 339     | 411   | 0.03              | 0.04    | 0.05  | 612          | 800     | 857   | 28                  | 46.4    | 54.2   | 0.998                    | 1.006   | 0.825 | 0.825                            | 0.518   | 0.857 | 0.857                            | 0.857   |       |
| 3275990     | NEGRO         | 112377     | 111757  | 113494  | 82                 | 49      | 50    | 0.07              | 0.04    | 0.04  | 119          | 162     | 204   | 11.5                | 6.5     | 9.4    | 0.99                     | 0.985   | 1.64  | 0.98                             | 1.222   | 0.683 | 0.683                            | 0.683   |       |
| 2569002     | MEKONG        | 667533     | 668603  | 666773  | 291                | 211     | 231   | 0.04              | 0.03    | 0.03  | 507          | 437     | 471   | 14.9                | 12.4    | 15     | 1.001                    | 1.003   | 1.26  | 0.913                            | 0.995   | 0.829 | 0.829                            | 0.829   |       |
| 4213711     | NELSON        | 1051075    | 1294587 | 1294651 | 202                | 324     | 376   | 0.02              | 0.03    | 0.03  | 539          | 570     | 599   | 11.9                | 28.1    | 32.2   | 0.812                    | 1       | 0.537 | 0.862                            | 0.371   | 0.874 | 0.874                            | 0.874   |       |
| 3629001     | AMAZON        | 4689800    | 4703705 | 4702228 | 1329               |         |       |                   |         |       |              |         |       |                     |         |        |                          |         |       |                                  |         |       |                                  |         |       |

## References

- Burek, P. and Smilovic, M.: The use of GRDC gauging stations for calibrating large-scale hydrological models, *Earth Syst. Sci Data Discussions*, 2022, 1–18, 10.5194/essd-2022-231, 2022.
- Burek, P., Satoh, Y., Kahil, T., Tang, T., Greve, P., Smilovic, M., Guillaumot, L., Zhao, F., and Wada, Y.: Development of the Community Water Model (CWatM v1. 04)—a high-resolution hydrological model for global and regional assessment of integrated water resources management, *Geosci. Model.Dev.*, 13, 3267–3298, 2020.
- IPCC: Climate Change 2021: The Physical Science Basis. Contribution of Working Group I to the Sixth Assessment Report of the Intergovernmental Panel on Climate Change, vol. In Press, Cambridge University Press, Cambridge, United Kingdom and New York, NY, USA, 10.1017/9781009157896, 2021.
- Pool, S., Vis, M., and Seibert, J.: Evaluating model performance: towards a non-parametric variant of the Kling-Gupta efficiency, *Hydrol. Sci. J.*, 63, 1941–1953, 2018.
- Wiersma, P., Aerts, J., Zekollari, H., Hrachowitz, M., Drost, N., Huss, M., Sutanudjaja, E. H., and Hut, R.: Coupling a global glacier model to a global hydrological model prevents underestimation of glacier runoff, *Hydrol. Earth Syst. Sci*, 26, 5971–5986, 2022.
